# Supplementary material for: Novel polycyclic “turn-on” and “turn-off” pyrazoline and pyrazole fluorescent sensors for selective real-world monitoring of Fe 3+ /Fe 2+ in aqueous environments
Source: Royal Society of Chemistry journal article supplement (doi:10.1039/d4ra06457g), 2024-01-01
Supplement: d4ra06457g1.pdf [file d4ra06457g1.pdf]

## Electronic Supplementary Information (ESI)

# Novel polycyclic “turn on” and “turn off” pyrazoline and pyrazole fluorescent sensors selective for Fe<sup>3+</sup>/Fe<sup>2+</sup> in aqueous environments for real-world monitoring

Alexander Ciupa\*

### General Experimental

Chemicals, solvents and reagents were purchased from commercial sources and used without further purification. PE refers to petroleum ether, bp 40-60 °C. Spectroscopy was performed with CHROMASOLV® gradient grade acetonitrile for HPLC, ≥99.9%, from Sigma-Aldrich.

The metal complexes used in this study were: LiCl, NaCl, KCl, CaCl<sub>2</sub>, MgCl<sub>2</sub>, CuCl<sub>2</sub>, CuSO<sub>4</sub>, Cu(OAc)<sub>2</sub>, NiCl<sub>2</sub>, ZnCl<sub>2</sub>, CdCl<sub>2</sub>, RuCl<sub>3</sub>, CoCl<sub>2</sub>, MnCl<sub>2</sub>, PbCl<sub>2</sub>, ZnCl<sub>2</sub>, FeSO<sub>4</sub> and FeCl<sub>3</sub>.

TLCs were carried out on Merck Aluminium backed TLC plates Silica Gel 60 F254 and viewed using UV light of wavelength 254 nm. Merck Silica Gel (0.040-0.063 mm) was used for column chromatography. Compounds were loaded as an oil, CH<sub>2</sub>Cl<sub>2</sub> solution or dry loaded by adsorption onto silica.

NMR spectra were obtained on a Bruker Avance III (400 MHz) spectrometer and processed via TopSpin® software. The chemical shifts are recorded in parts per million (ppm) with reference to tetramethylsilane. The coupling constants J are quoted to the nearest 0.5 Hz and are not corrected.

High resolution Mass spectroscopy was performed on Bruker Quadrupole Time-of-Flight (qToF) mass spectrometer.

UV/Vis spectroscopy was performed on an Agilent Cary5000 in quartz cuvettes with a 1 cm pathlength using HPLC grade MeCN, 250-500 nm range with 0.2 sec dwell time. Detector switchover occurred at 350 nm.

FTIR spectroscopy was performed on a Bruker VERTEX 70 spectrometer.

Fluorescence spectroscopy was performed on an Edinburgh Instruments FLS1000 with a xenon excitation source, 2 nm bandwidths for both excitation and emission monochromator, scan speed of 1 nm and dwell time of 0.2 sec. Fluorescence quartz cuvettes with a 1 cm pathlength were used throughout with HPLC grade MeCN. Quantum yields were determined using the absolute method and use of a Edinburgh instruments integrating sphere, <https://www.edinst.com/wp-content/uploads/2016/02/FLS980-Series-Reference-Guide-Integrating-Sphere.pdf>

A 100 Watt 365 nm Analytikjena High intensity UV lamp was used to image the sensors in cuvettes with 5.0 equivalent indicated metal, sensor concentration was 20 μM, solvent was MeCN.

All figures were plotted using SigmaPlot® 14.5 software.

## General Synthesis (S1)

### Synthesis of chalcones **C1-C2**

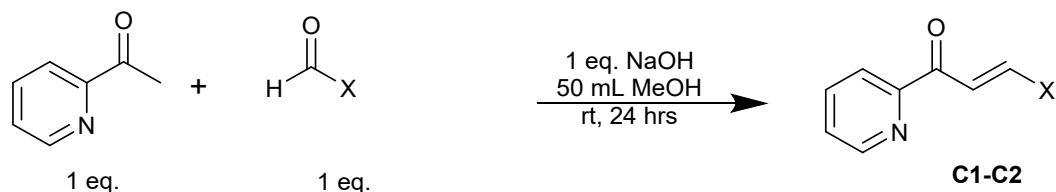

Using a method adapted from a previous synthesis (*RSC Adv.*, 2017, **7**, 44272), 5.0 mmol 2-acetylpyridine was added to a stirred solution of 5.0 mmol aldehyde (1-naphthaldehyde or 9-anthraldehyde) in MeOH followed by the addition of 5.0 mmol NaOH and stirring continued. After 24 hours the solvent was removed under reduced pressure and the residue was filtered, washed with copious amounts of cold H<sub>2</sub>O and collected and dried to afford the desired chalcone without further purification.

### Synthesis of 1-4

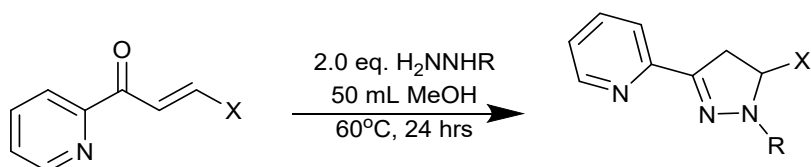

Using a method adapted from a previous synthesis (*RSC Adv.*, 2024, **14**, 3519), the required hydrazine (H<sub>2</sub>NNHMe or H<sub>2</sub>NNHPh) 2.0 mmol was added to a stirred solution of the required chalcone (**C1** or **C2**) 1.0 mmol in MeOH at 60°C. After 24 hours the solvent was removed under reduced pressure to afford an oil which was extracted into 100 mL ethyl acetate and washed with 3 x 50 mL water. The ethyl acetate was removed under reduced pressure to afford an oil which was further purified by column chromatography using an 8:2 PE: ethyl acetate mixture to give the desired pyrazoline.

### Synthesis of 5-7

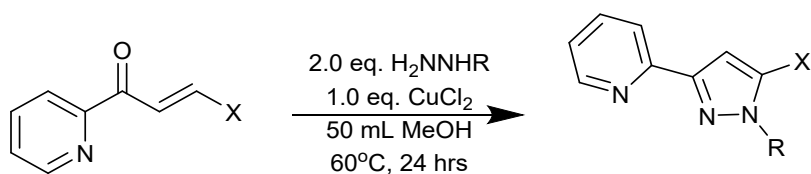

Using a method from the literature (*New J. Chem.*, 2024, **48**, 13900), the required hydrazine (H<sub>2</sub>NNHMe or H<sub>2</sub>NNHPh) 2.0 mmol was added to a stirred solution of required chalcone (**C1** or **C2**) 1.0 mmol in 50 mL MeOH at 60°C followed by the addition of CuCl<sub>2</sub> (1.0 mmol). After 24 hrs the solution was removed under reduced pressure, the residue resuspended in 100 mL of a saturated EDTA solution and extracted with ethyl acetate (3 x 50 mL). The ethyl acetate layers were combined, and solvent removed under reduced pressure. The residue was then purified by column chromatography using PE: ethyl acetate (80:20) to afford the required pyrazole.

Synthesis of (E)-3-(naphthalen-1-yl)-1-(pyridin-2-yl)prop-2-en-1-one (**C1**)

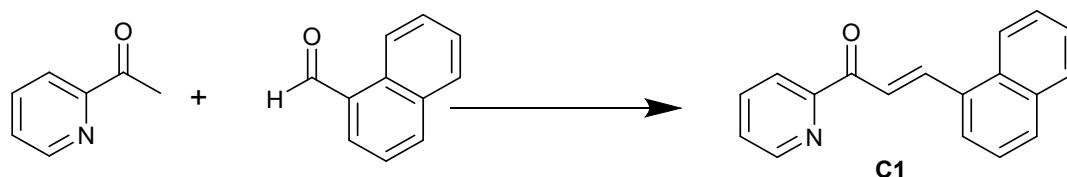

**Yield** 1.21g (93%);

**V<sub>max</sub>** (Solid)/cm<sup>-1</sup> 1854, 1533, 1427 and 1106;

**<sup>1</sup>H NMR** δ<sub>H</sub> (400 MHz; CDCl<sub>3</sub>) 7.52-7.64 (5 H, m, CH), 7.91-7.97 (3 H, m, CH), 8.09 (1 H, d, *J* = 7.2 Hz, CH), 8.27 (1 H, d, *J* = 8 Hz, CH), 8.37 (1 H, d, *J* = 8.4 Hz, CH), 8.43 (1 H, d, *J* = 16.0 Hz, CH), 8.79 (1 H, m, CH) and 8.82 (1 H, d, *J* = 16.0 Hz, CH);

**<sup>13</sup>C NMR** δ<sub>C</sub> (400 MHz; CDCl<sub>3</sub>) 121.8, 123.0, 123.3, 123.5, 125.1, 125.5, 125.6, 126.2, 126.9, 131.0, 132.0, 132.4, 133.8, 137.1, 141.4, 148.0, 154.3 and 189.4;

**HRMS m/z (qToF)** Found 260.1104 (M+H<sup>+</sup>). C<sub>18</sub>H<sub>14</sub>NO requires 260.1075.

Synthesis of (E)-3-(anthracen-9-yl)-1-(pyridin-2-yl)prop-2-en-1-one (**C2**)

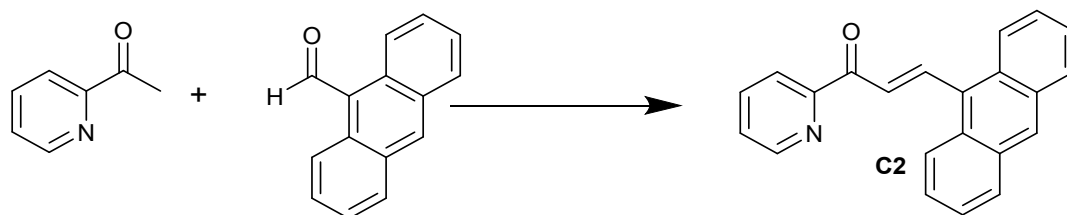

**Yield** 1.15g (75%);

**V<sub>max</sub>** (Solid)/cm<sup>-1</sup> 1717, 1531, 1426, 1381 and 1163;

**<sup>1</sup>H NMR** δ<sub>H</sub> (400 MHz; CDCl<sub>3</sub>) 7.52-7.56 (5 H, m, CH), 7.94-7.95 (1 H, m, CH), 8.45-8.07 (2 H, m, CH), 8.29-8.33 (2 H, m, CH), 8.39-8.41 (2 H, m, CH), 8.50 (1 H, s, CH), 8.72-8.74 (1 H, m, CH) and 8.96 (1 H, d, *J* = 16.0 Hz, CH);

**<sup>13</sup>C NMR** δ<sub>C</sub> (400 MHz; CDCl<sub>3</sub>) 122.6, 123.1, 123.6, 125.1, 125.4, 125.5, 125.6, 126.7, 127.0, 127.3, 128.4, 128.5, 128.8, 129.1, 129.3, 129.8, 130.2, 130.4, 134.1, 136.8, 154.2 and 189.4;

**HRMS m/z (qToF)** Found 310.1255 (M+H<sup>+</sup>). C<sub>22</sub>H<sub>16</sub>NO requires 310.1232.

Above data consistent with spectra from *RSC Adv.*, 2017, **7**, 44272.

Synthesis of 2-(1-methyl-5-(naphthalen-1-yl)-4,5-dihydro-1H-pyrazol-3-yl)pyridine (**1**)

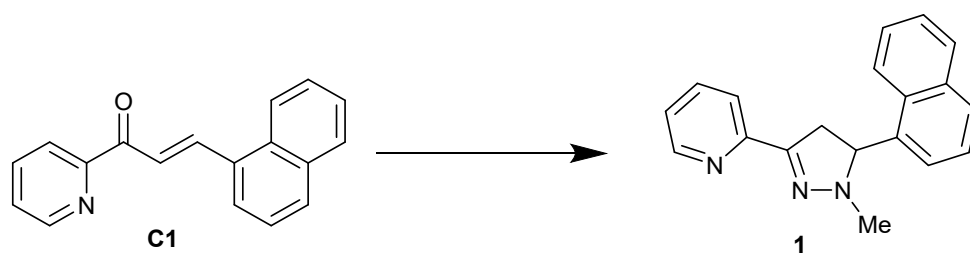

**Yield** 0.065g oil (23%);

**Vmax** (film)/cm<sup>-1</sup> 1855, 1548, 1427, 1381 and 1166;

**<sup>1</sup>H NMR** δ<sub>H</sub> (400 MHz; CDCl<sub>3</sub>) 3.05-3.13 (4 H, m, CH<sub>3</sub>), 4.06 (1 H, m, CH), 4.95 (1 H, m, CH), 7.21 (1 H, m, CH), 7.53- 7.55 (3 H, m, CH), 7.68-7.07 (1 H, m, CH), 7.26-7.38 (2 H, m, CH), 7.85-7.93 (1 H, m, CH), 7.94-7.97 (1 H, m, CH), 8.07-8.09 (1 H, m, CH) and 8.57-8.59 (1 H, m, CH);

**<sup>13</sup>C NMR** δ<sub>C</sub> (400 MHz; CDCl<sub>3</sub>) 41.8, 120.5, 122.7, 123.4, 124.0, 125.4, 125.7, 126.1, 126.4, 128.1, 128.6, 128.9, 131.4, 134.0, 136.1, 136.2, 149.2, 150.2 and 152.1;

**HRMS m/z (qToF)** Found 288.1476 (M+H<sup>+</sup>). C<sub>19</sub>H<sub>18</sub>N<sub>3</sub> requires 288.1501.

Synthesis of 2-(5-(naphthalen-1-yl)-1-phenyl-4,5-dihydro-1H-pyrazol-3-yl)pyridine (**2**)

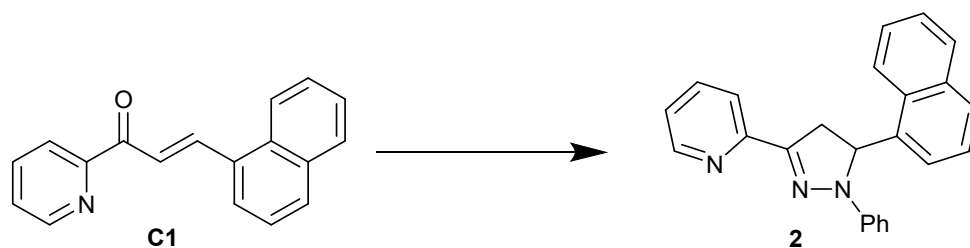

**Yield** 0.093g oil (26%);

**Vmax** (film)/cm<sup>-1</sup> 1704, 1565, 1443, 1237 and 1198;

**<sup>1</sup>H NMR** δ<sub>H</sub> (400 MHz; CDCl<sub>3</sub>) 3.34-3.40 (1 H, m, CH), 4.21-4.26 (1 H, m, CH), 6.05-6.84 (1 H, m, CH), 6.82-6.85 (1 H, m, CH), 7.10-7.18 (2 H, m, CH), 7.18-7.23 (3 H, m, CH), 7.35-7.38 (2 H, m, CH), 7.58-7.60 (3 H, m, CH), 7.07-7.74 (1 H, m, CH), 7.78-7.81 (1 H, m, CH), 8.12-8.14 (1 H, m, CH), 8.19-8.21 (1 H, m, CH) and 8.51-8.52 (1 H, m, CH);

**<sup>13</sup>C NMR** δ<sub>C</sub> (400 MHz; CDCl<sub>3</sub>) 42.2, 113.5, 119.6, 120.6, 122.7, 123.1, 125.8, 126.4, 128.0, 128.9, 129.0, 129.2, 129.9, 134.4, 136.0, 136.7, 144.3, 147.1, 148.6, 149.1, 152.1 and 152.1;

**HRMS m/z (qToF)** Found 338.1620 (M+H<sup>+</sup>). C<sub>23</sub>H<sub>20</sub>N<sub>3</sub> requires 338.1657.

Synthesis of 2-(5-(anthracen-9-yl)-1-methyl-4,5-dihydro-1H-pyrazol-3-yl)pyridine (**3**)

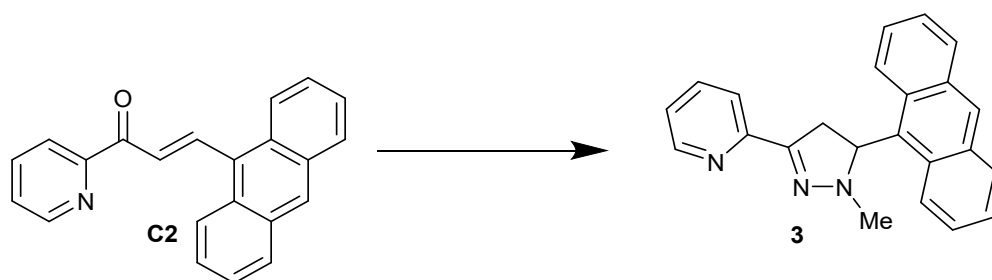

**Yield** 0.024g oil (7%);

**Vmax** (film)/cm<sup>-1</sup> 1856, 1550, 1444 and 1192;

**<sup>1</sup>H NMR** δ<sub>H</sub> (400 MHz; CDCl<sub>3</sub>) 2.82 (3 H, s, CH<sub>3</sub>), 3.57- 3.65 (1 H, m, CH), 3.78-3.81 (1 H, m, CH), 5.66- 5.72 (1 H, m, CH), 7.15-7.16 (1 H, m, CH), 7.33-7.46 (5 H, m, CH), 7.63-7.66 (1 H, m, CH), 7.93-7.99 (2 H, m, CH), 8.27-8.29 (1 H, m, CH), 8.40 (1 H, s, CH), 8.51- 8.52 (1 H, m, CH) and 8.73-8.74 (1 H, m, CH);

**<sup>13</sup>C NMR** δ<sub>C</sub> (400 MHz; CDCl<sub>3</sub>) 41.5, 68.0, 120.6, 122.5, 122.7, 124.8, 125.0, 125.1, 125.6, 126.1, 126.4, 126.7, 127.3, 128.5, 129.4, 129.5, 129.6, 129.8, 131.0, 131.2, 134.1, 136.1, 149.3, 149.6 and 152.3;

**HRMS m/z (qToF)** Found 350.1627 (M+H<sup>+</sup>). C<sub>24</sub>H<sub>21</sub>N<sub>3</sub> requires 350.1657.

Synthesis of 2-(5-(anthracen-9-yl)-1-phenyl-4,5-dihydro-1H-pyrazol-3-yl)pyridine (**4**)

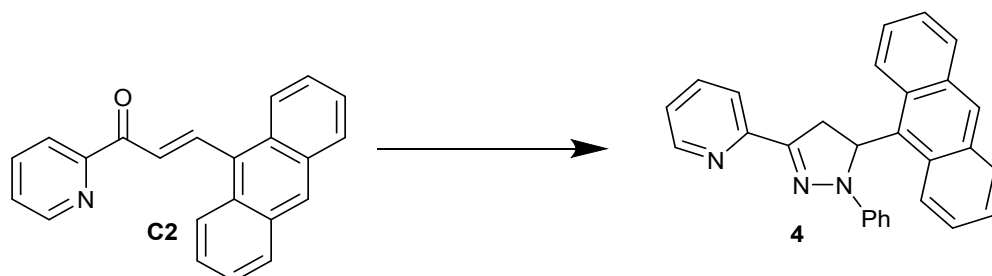

**Yield** 0.061g oil (15%);

**Vmax** (film)/cm<sup>-1</sup> 1854, 1546, 1427 and 1237;

**<sup>1</sup>H NMR** δ<sub>H</sub> (400 MHz; CDCl<sub>3</sub>) 3.66-3.74 (1 H, m, CH), 4.22-4.30 (1 H, m, CH), 6.70 (1 H, m, CH), 7.00 (3 H, m, CH), 7.36-7.39 (1 H, m, CH), 7.41-7.57 (2 H, m, CH), 7.60-7.66 (7 H, m, CH), 7.80 (1 H, m, CH), 8.01 (1 H, m, CH), 8.13 (2 H, m, CH), 8.31 (1 H, m, CH), 8.53 (2 H, m, CH) and 8.58 (1 H, m, CH);

**<sup>13</sup>C NMR** δ<sub>C</sub> (400 MHz; CDCl<sub>3</sub>) 42.1, 61.3, 113.8, 119.9, 120.9, 122.3, 122.8, 124.2, 124.9, 125.1, 126.3, 127.0, 128.5, 128.8, 129.2, 129.4, 129.5, 129.0, 131.7, 132.2, 136.0, 145.3, 149.3 and 152.2;

**HRMS m/z (qToF)** Found 400.1774 (M+H<sup>+</sup>). C<sub>28</sub>H<sub>22</sub>N<sub>3</sub> requires 400.1814.

Synthesis of 2-(1-methyl-5-(naphthalen-1-yl)-1H-pyrazol-3-yl)pyridine (**5**)

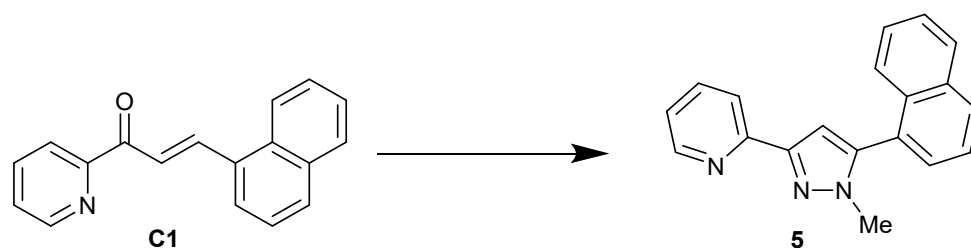

**Yield** 0.014g oil (5%);

**Vmax** (film)/cm<sup>-1</sup> 1711, 1547 and 1190;

**<sup>1</sup>H NMR**  $\delta_{\text{H}}$  (400 MHz; CDCl<sub>3</sub>) 4.03 (3 H, s, CH<sub>3</sub>), 6.28-6.30 (1 H, m, CH), 6.49-6.53 (1 H, m, CH), 6.70 (1 H, s, CH), 6.26-7.63 (6 H, m, CH), 7.92-7.95 (3 H, m, CH), 8.05-8.06 (1 H, m, CH), 8.21- 8.22 (1 H, m, CH) and 8.92-8.94 (1 H, m, CH);

**<sup>13</sup>C NMR**  $\delta_{\text{C}}$  (400 MHz; CDCl<sub>3</sub>) 39.5, 63.7, 107.4, 122.5, 122.9, 123.7, 125.4, 125.8, 126.2, 126.3, 127.0, 128.3, 131.4, 134.0, 136.8, 142.1, 149.3, 149.8 and 150.0;

**HRMS m/z (qToF)** Found 286.1301 (M+H<sup>+</sup>). C<sub>19</sub>H<sub>16</sub>N<sub>3</sub> requires 286.1344.

Synthesis of 2-(5-(anthracen-9-yl)-1-methyl-1H-pyrazol-3-yl)pyridine (**6**)

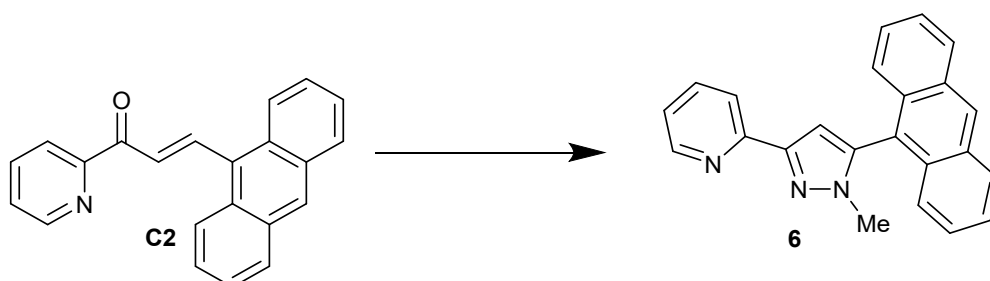

**Yield** 0.024g oil (7%);

**Vmax** (film)/cm<sup>-1</sup> 1714, 1559, 1443 and 1243;

**<sup>1</sup>H NMR**  $\delta_{\text{H}}$  (400 MHz; CDCl<sub>3</sub>) 3.95 (3 H, s, CH<sub>3</sub>), 6.09-6.11 (1 H, m, CH), 6.41-6.44 (1 H, m, CH), 6.69 (1 H, s, CH), 7.29-7.31 (2 H, m, CH), 7.38-7.49 (6 H, m, CH), 7.98-8.00 (2 H, m, CH) and 8.50 (1H, s, CH);

**<sup>13</sup>C NMR**  $\delta_{\text{C}}$  (400 MHz; CDCl<sub>3</sub>); 59.4, 103.6, 110.5, 113.6, 115.7, 116.8, 119.9, 121.8, 125.4, 125.9, 126.3, 128.2, 128.7, 131.6, 131.9, 134.2 and 138.6;

**HRMS m/z (qToF)** Found 336.1490 (M+H<sup>+</sup>). C<sub>23</sub>H<sub>18</sub>N<sub>3</sub> requires 336.1501.

Synthesis of 2-(5-(anthracen-9-yl)-1-phenyl-1H-pyrazol-3-yl)pyridine (**7**)

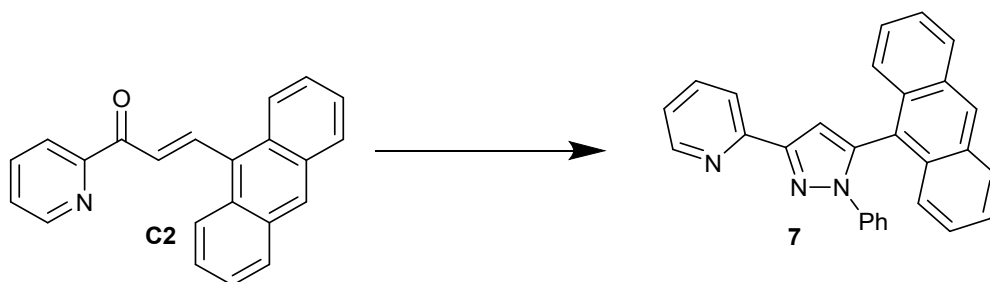

**Yield** 0.094g oil (24%);

**Vmax** (film)/cm<sup>-1</sup> 1702, 1542, 1445 and 1167;

**<sup>1</sup>H NMR** δ<sub>H</sub> (400 MHz; CDCl<sub>3</sub>) 6.99-7.01 (3 H, m, CH), 7.19-7.21 (2 H, m, CH), 7.21-7.29 (1 H, m, CH), 7.31-7.47 (5 H, m, CH), 7.81-7.85 (3 H, m, CH), 8.02-8.04 (2 H, m, CH), 8.26-8.29 (1 H, m, CH), 8.56 (1 H, s, CH) and 8.73-8.74 (1 H, m, CH);

**<sup>13</sup>C NMR** δ<sub>C</sub> (400 MHz; CDCl<sub>3</sub>) 110.0, 120.5, 122.8, 123.4, 124.6, 125.4, 125.8, 126.6, 127.1, 128.5, 128.6, 128.9, 131.1, 131.2, 136.7, 140.0, 140.9, 149.6, 152.2 and 152.4;

**HRMS m/z (qToF)** Found 398.1610 (M+H<sup>+</sup>). C<sub>28</sub>H<sub>20</sub>N<sub>3</sub> requires 398.1657.

# NMR Spectra (S2)

## E)-3-(naphthalen-1-yl)-1-(pyridin-2-yl)prop-2-en-1-one (C1)

Nap Chalcone  
PROTON16.CMDnp CDCl3 {C:\Bruker\TopSpin3.6.5} nmrsu 84

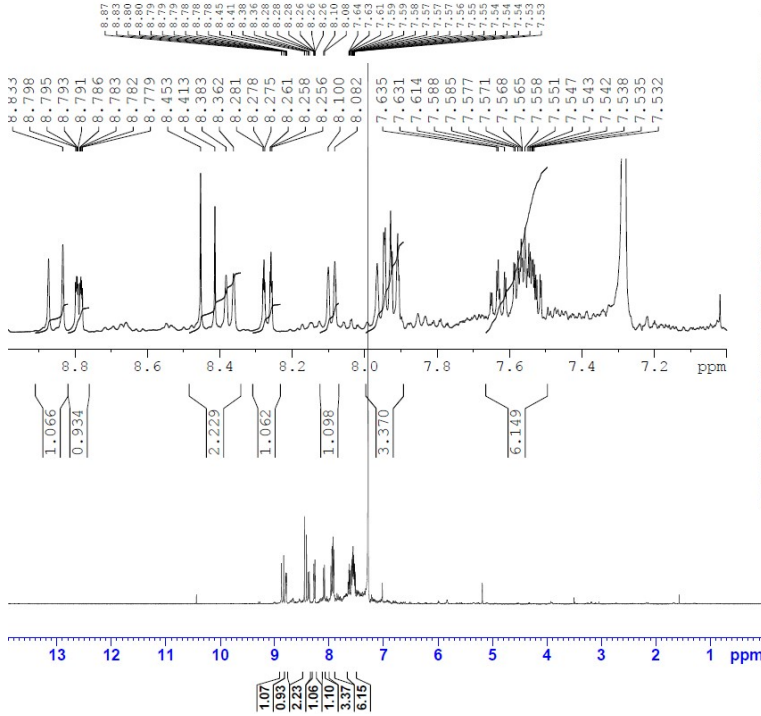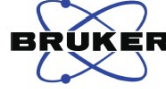

Current Data Parameters  
NAME Aug23-2024-Alex  
EXPNO 50  
PROCNO 1

F2 - Acquisition Parameters  
Date\_ 20240824  
Time 18.50 h  
INSTRUM av400  
PROBHD Z163739\_1011 ( )  
PULPROG zg30  
TD 65536  
SOLVENT CDCl3  
NS 16  
DS 2  
SWH 6410.256 Hz  
FIDRES 0.195605 Hz  
AQ 5.1118078 sec  
RG 104.12  
DW 78.000 usec  
DE 6.50 usec  
TE 298.2 K  
D1 1.00000000 sec  
TD0 1  
SFO1 400.1324008 MHz  
NUC1 1H  
P0 2.67 usec  
P1 8.00 usec  
PLW1 22.48500061 W

F2 - Processing parameters  
SI 32768  
SF 400.1300000 MHz  
WDW EM  
SSB 0  
LB 0.30 Hz  
GB 0  
PC 1.00

Nap Chalcone  
C13CPD1024.CMDnp CDCl3 {C:\Bruker\TopSpin3.6.5} nmrsu 84

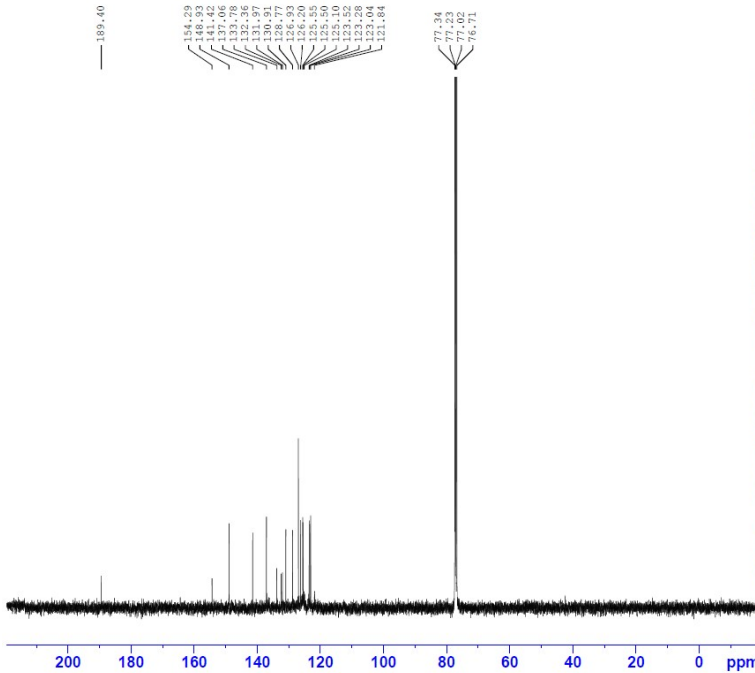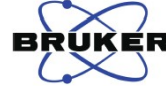

Current Data Parameters  
NAME Aug23-2024-Alex  
EXPNO 51  
PROCNO 1

F2 - Acquisition Parameters  
Date\_ 20240824  
Time 19.50 h  
INSTRUM av400  
PROBHD Z163739\_1011 ( )  
PULPROG zgpg30  
TD 65536  
SOLVENT CDCl3  
NS 1024  
DS 4  
SWH 24038.461 Hz  
FIDRES 0.733596 Hz  
AQ 1.3631488 sec  
RG 209.49  
DW 20.800 usec  
DE 6.50 usec  
TE 298.2 K  
D1 2.00000000 sec  
D11 0.03000000 sec  
TD0 1  
SFO1 100.6228260 MHz  
NUC1 13C  
P0 2.67 usec  
P1 8.00 usec  
PLW1 100.87999728 W  
SFO2 400.1316008 MHz  
NUC2 1H  
CPDPRG12 waltz16  
PCPD2 90.00 usec  
PLW2 22.48500061 W  
PLW12 0.17766000 W  
PLW13 0.08936300 W

F2 - Processing parameters  
SI 32768  
SF 100.6127685 MHz  
WDW EM  
SSB 0  
LB 1.00 Hz  
GB 0  
PC 1.40



(E)-3-(anthracen-9-yl)-1-(pyridin-2-yl)prop-2-en-1-one (C2)

Ant Chalcone  
 PROTON16.CMDnp CDC13 (C:\Bruker\TopSpin3.6.5) nmrsu 85

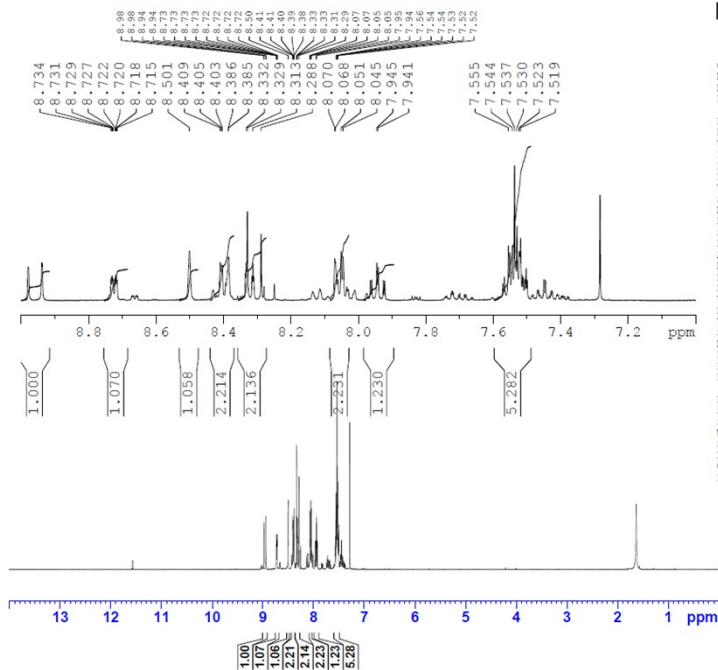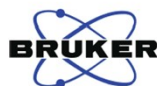

Current Data Parameters  
 NAME Aug23-2024-Alex  
 EXPNO 60  
 PROCNO 1

F2 - Acquisition Parameters  
 Date\_ 20240824  
 Time 12:57 h  
 INSTRUM av400  
 PROBHD Z163739\_1011 ( )  
 PULPROG zgpg30  
 TD 65536  
 SOLVENT CDCl3  
 NS 16  
 DS 2  
 SWH 6410.256 Hz  
 FIDRES 0.135623 Hz  
 AQ 5.1118078 sec  
 RG 166.23  
 DW 78.000 usec  
 DE 6.50 usec  
 TE 298.2 K  
 D1 1.00000000 sec  
 TDO  
 SFO1 400.1324008 MHz  
 NUC1 1H  
 P0 2.67 usec  
 P1 8.00 usec  
 PLW1 22.48500061 W

F2 - Processing Parameters  
 SI 32768  
 SF 400.1300000 MHz  
 WDW EM  
 SSB 0  
 LB 0.30 Hz  
 GB 0  
 PC 1.00

Ant Chalcone  
 C13CPD1024.CMDnp CDC13 (C:\Bruker\TopSpin3.6.5) nmrsu 85

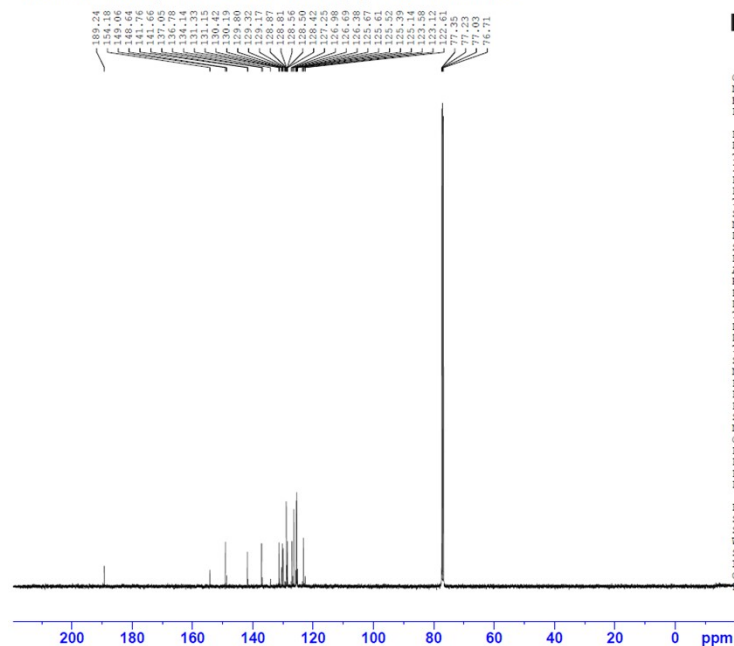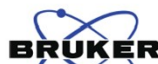

Current Data Parameters  
 NAME Aug23-2024-Alex  
 EXPNO 61  
 PROCNO 1

F2 - Acquisition Parameters  
 Date\_ 20240824  
 Time 20:57 h  
 INSTRUM av400  
 PROBHD Z163739\_1011 ( )  
 PULPROG zgpg30  
 TD 65536  
 SOLVENT CDCl3  
 NS 1024  
 DS 4  
 SWH 24038.461 Hz  
 FIDRES 0.733596 Hz  
 AQ 1.3631488 sec  
 RG 205.43  
 DW 20.800 usec  
 DE 6.50 usec  
 TE 298.2 K  
 D1 2.00000000 sec  
 D11 0.03000000 sec  
 TDO  
 SFO1 100.6228260 MHz  
 NUC1 13C  
 P0 2.67 usec  
 P1 8.00 usec  
 PLW1 100.87999725 W  
 SFO2 400.1316005 MHz  
 NUC2 1H  
 CPDPRG2 waltra16  
 FCFD2 90.00 usec  
 PLW2 22.48500061 W  
 PLW12 0.17766000 W  
 PLW13 0.08936300 W

F2 - Processing Parameters  
 SI 32768  
 SF 100.6127685 MHz  
 WDW EM  
 SSB 0  
 LB 1.00 Hz  
 GB 0  
 PC 1.40

# 2-(1-methyl-5-(naphthalen-1-yl)-4,5-dihydro-1H-pyrazol-3-yl)pyridine (1)

Nap Methyl Pyrazoline  
 PROTON16.CMDnp CDCl3 {C:\Bruker\TopSpin3.6.5} nmrsu 80

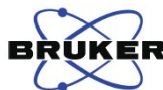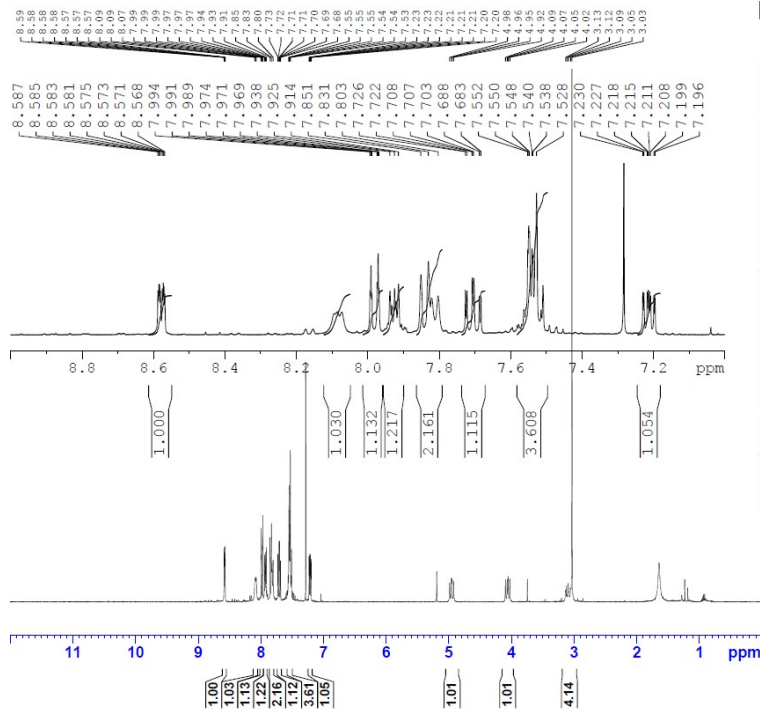

Current Data Parameters  
 NAME Aug23-2024-alex  
 EXPNO 10  
 PROCNO 1

F2 - Acquisition Parameters  
 Date\_ 20240823  
 Time 17.24 h  
 INSTRUM av400  
 PROBHD Z163739\_1011 ( )  
 PULPROG zg30  
 TD 65536  
 SOLVENT CDCl3  
 NS 16  
 DS 2  
 SWH 6410.256 Hz  
 FIDRES 0.195628 Hz  
 AQ 5.1118078 sec  
 RG 104.12  
 DW 78.000 usec  
 DE 6.50 usec  
 TE 298.2 K  
 D1 1.00000000 sec  
 TDO 1  
 SFO1 400.1324008 MHz  
 NUC1 1H  
 P0 2.67 usec  
 F1 8.00 usec  
 PLW1 22.48500061 W

F2 - Processing parameters  
 SI 32768  
 SF 400.1300000 MHz  
 WDW EM  
 SSB 0  
 LB 0.30 Hz  
 GB 0  
 FC 1.00

Nap Methyl Pyrazoline  
 C13CPD1024.CMDnp CDCl3 {C:\Bruker\TopSpin3.6.5} nmrsu 80

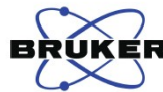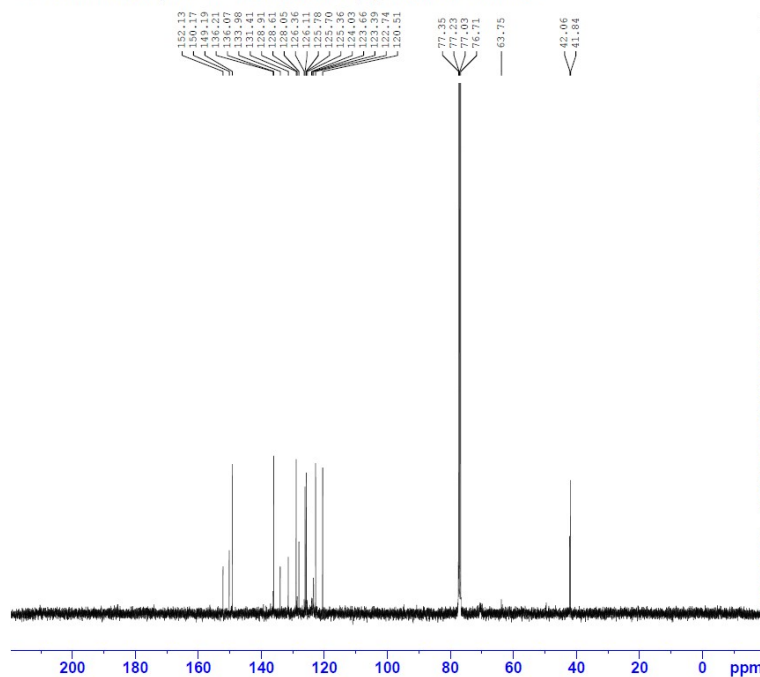

Current Data Parameters  
 NAME Aug23-2024-alex  
 EXPNO 11  
 PROCNO 1

F2 - Acquisition Parameters  
 Date\_ 20240823  
 Time 18.25 h  
 INSTRUM av400  
 PROBHD Z163739\_1011 ( )  
 PULPROG zgpg30  
 TD 65536  
 SOLVENT CDCl3  
 NS 1024  
 DS 4  
 SWH 24038.461 Hz  
 FIDRES 0.733566 Hz  
 AQ 1.3631488 sec  
 RG 209.43  
 DW 20.800 usec  
 DE 6.50 usec  
 TE 298.2 K  
 D1 2.00000000 sec  
 D11 0.03000000 sec  
 TDO 1  
 SFO1 100.6228260 MHz  
 NUC1 13C  
 P0 2.67 usec  
 F1 8.00 usec  
 PLW1 100.87895725 W  
 SFO2 400.1316005 MHz  
 NUC2 1H  
 CPOPRG[2] waltz16  
 FCPD2 90.00 usec  
 PLW2 22.48500061 W  
 PLW12 0.17766000 W  
 PLW13 0.08936300 W

F2 - Processing parameters  
 SI 32768  
 SF 100.6127685 MHz  
 WDW EM  
 SSB 0  
 LB 1.00 Hz  
 GB 0  
 FC 1.40

## 2-(5-(naphthalen-1-yl)-1-phenyl-4,5-dihydro-1H-pyrazol-3-yl)pyridine (2)

Nap Phenyl Pyrazoline  
 PROTON16.CMDnp CDCl3 {C:\Bruker\TopSpin3.6.5} nmr su 81

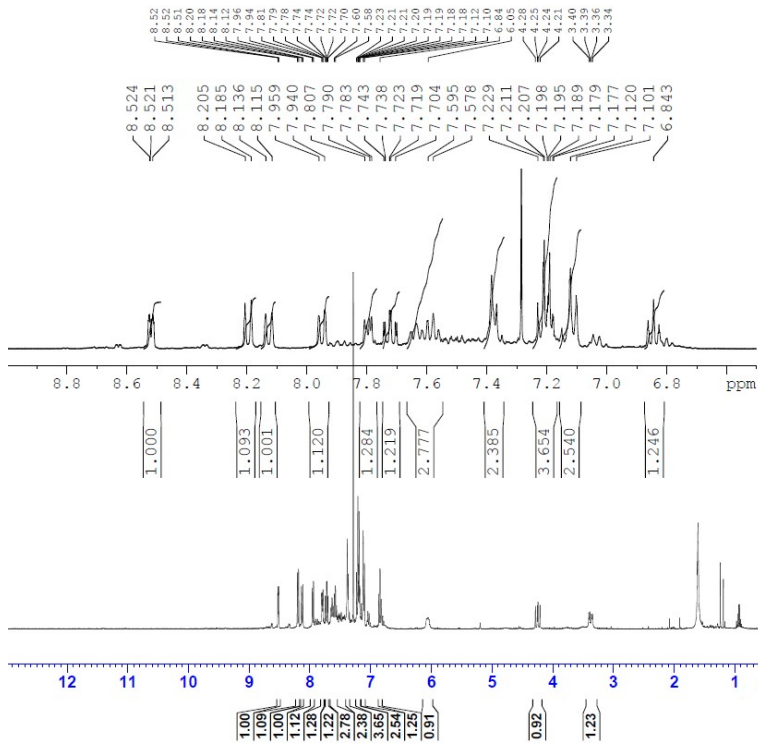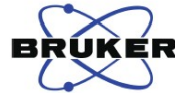

Current Data Parameters  
 NAME Aug23-2024-Alex  
 EXNO 20  
 PROCNO 1

F2 - Acquisition Parameters  
 Date\_ 20240823  
 Time\_ 18.30 h  
 INSTRUM av400  
 PROBHD Z163739\_1011 ( )  
 PULPROG zg30  
 TD 65536  
 SOLVENT CDCl3  
 NS ic  
 DS 2  
 SWH 6410.256 Hz  
 FIDRES 0.195625 Hz  
 AQ 5.1118078 sec  
 RG 166.23  
 DW 75.000 usec  
 DE 6.50 usec  
 TE 298.2 K  
 D1 1.00000000 sec  
 TDO 1  
 SFO1 400.1324005 MHz  
 NUC1 1H  
 P0 2.67 usec  
 F1 8.00 usec  
 PLW1 22.48500061 W

F2 - Processing parameters  
 SI 32768  
 SF 400.1300000 MHz  
 WDW EM  
 SSB 0  
 LB 0.30 Hz  
 GB 0  
 C 1.00

Nap Phenyl Pyrazoline  
 C13CPD1024.CMDnp CDCl3 {C:\Bruker\TopSpin3.6.5} nmr su 81

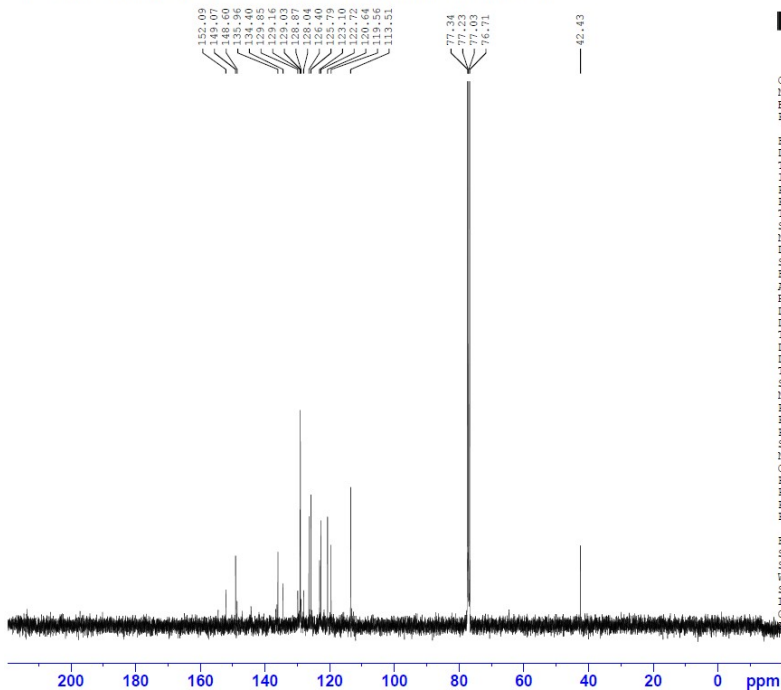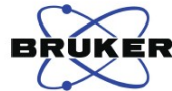

Current Data Parameters  
 NAME Aug23-2024-Alex  
 EXNO 21  
 PROCNO 1

F2 - Acquisition Parameters  
 Date\_ 20240823  
 Time\_ 19.30 h  
 INSTRUM av400  
 PROBHD Z163739\_1011 ( )  
 PULPROG zgpg30  
 TD 65536  
 SOLVENT CDCl3  
 NS 1024  
 DS 4  
 SWH 24038.461 Hz  
 FIDRES 0.733596 Hz  
 AQ 1.3631489 sec  
 RG 209.43  
 DW 20.800 usec  
 DE 6.50 usec  
 TE 298.2 K  
 D1 2.00000000 sec  
 D11 0.03000000 sec  
 TDO 1  
 SFO1 100.6228260 MHz  
 NUC1 13C  
 P0 2.67 usec  
 F1 8.00 usec  
 ELW1 100.87989725 W  
 SFO2 400.1316005 MHz  
 NUC2 1H  
 CPDPRG12 waltz16  
 ECED2 80.00 usec  
 PLM2 22.48500061 W  
 PLW2 0.17766000 W  
 PLW3 0.08886300 W

F2 - Processing parameters  
 SI 32768  
 SF 100.6127685 MHz  
 WDW EM  
 SSB 0  
 LB 1.00 Hz  
 GB 0  
 C 1.40

## 2-(5-(anthracen-9-yl)-1-methyl-4,5-dihydro-1H-pyrazol-3-yl)pyridine (3)

Ant Methyl Pyrazoline  
 PROTON16.CMDnp CDC13 (C:\Bruker\TopSpin3.6.5) nmrsu 82

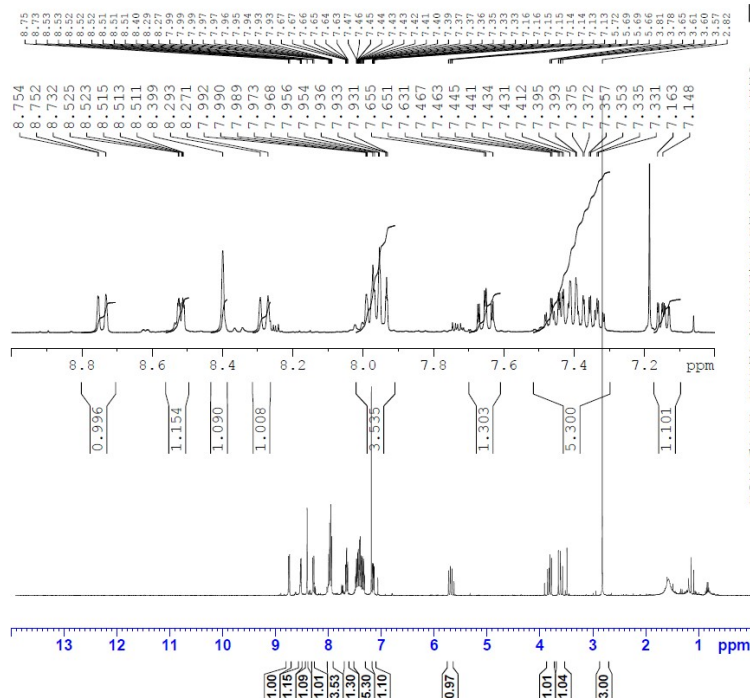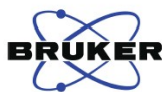

Ant Methyl Pyrazoline  
 C13CPD1024.CMDnp CDC13 (C:\Bruker\TopSpin3.6.5) nmrsu 82

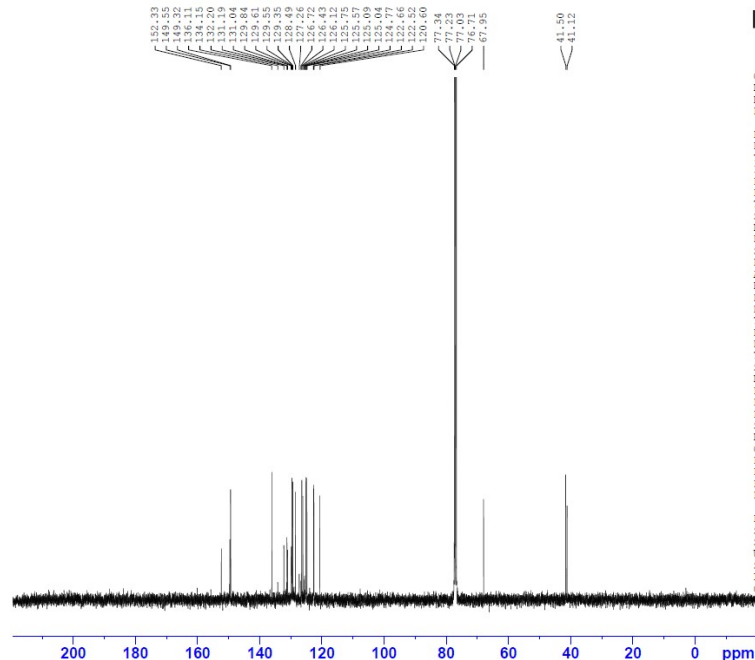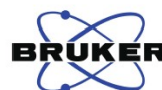

## 2-(5-(anthracen-9-yl)-1-phenyl-4,5-dihydro-1H-pyrazol-3-yl)pyridine (4)

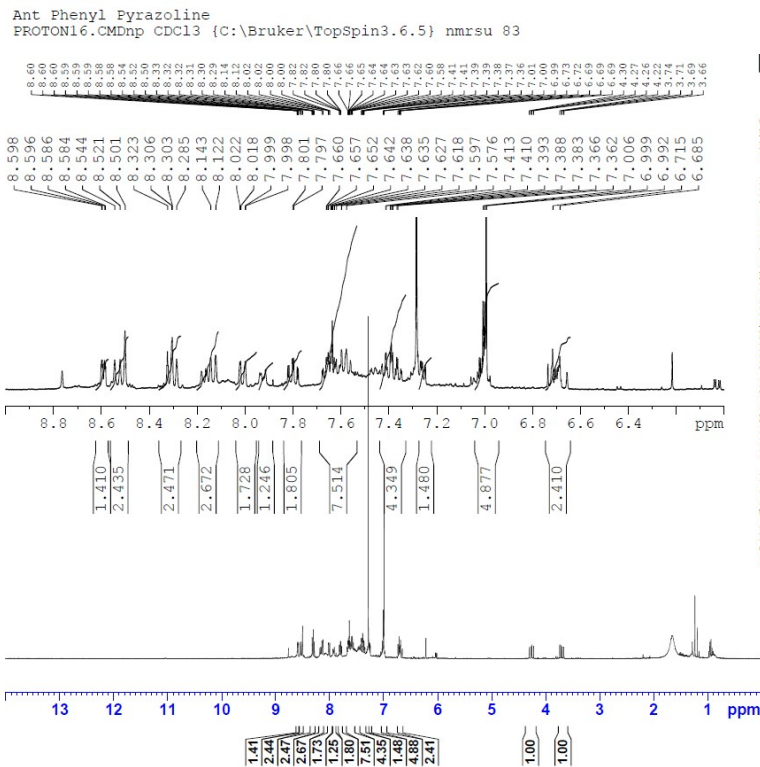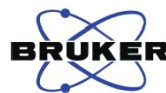

Current Data Parameters  
NAME Aug23-2024-Alex  
EXPNO 10  
PROCNO 1

F2 - Acquisition Parameters  
Date\_ 20240823  
Time 20.43 h  
INSTRUM av400  
PROBHD Z163739\_1011 ( (   
PULPROG zg30  
TD 65536  
SOLVENT CDCl3  
NS 16  
DS 2  
SWH 6410.256 Hz  
FIDRES 0.195625 Hz  
AQ 5.1118078 sec  
RG 185.2  
DW 78.000 usec  
DE 6.50 usec  
TE 298.2 K  
D1 1.00000000 sec  
SFO1 400.1324008 MHz  
NUC1 1H  
PC 2.67 usec  
PI 8.00 usec  
PLW1 22.48500061 W

F2 - Processing parameters  
SI 32768  
SF 400.1300000 MHz  
WDW EM  
SSB 0  
LB 0.30 Hz  
GB 0  
PC 1.00

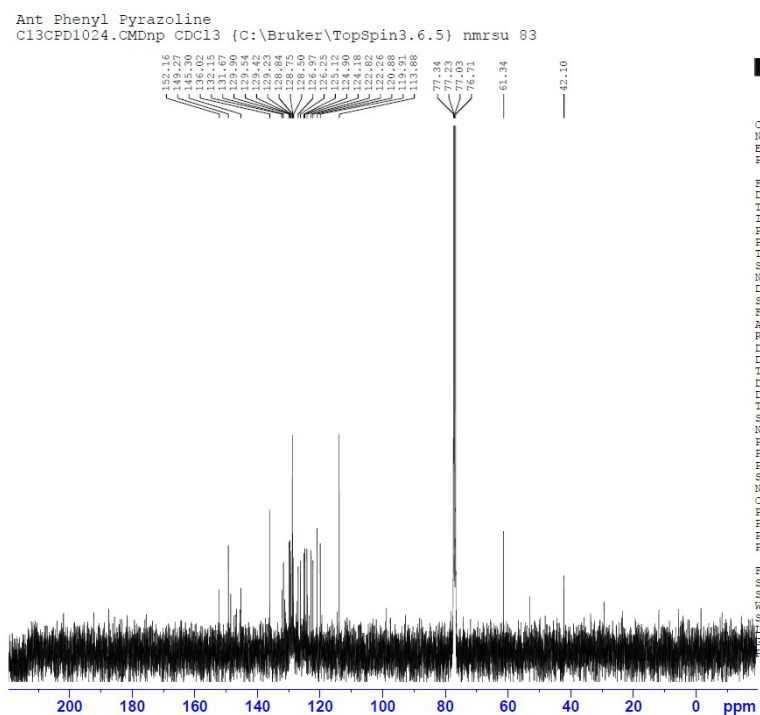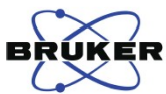

Current Data Parameters  
NAME Aug23-2024-Alex  
EXPNO 41  
PROCNO 1

F2 - Acquisition Parameters  
Date\_ 20240823  
Time 21.43 h  
INSTRUM av400  
PROBHD Z163739\_1011 ( (   
PULPROG zgpg30  
TD 65536  
SOLVENT CDCl3  
NS 1024  
DS 4  
SWH 24098.461 Hz  
FIDRES 0.733596 Hz  
AQ 1.3631488 sec  
RG 209.43  
DW 20.800 usec  
DE 6.50 usec  
TE 298.2 K  
D1 2.00000000 sec  
D11 0.03000000 sec  
TDO 1  
SFO1 100.6228260 MHz  
NUC1 13C  
PC 2.67 usec  
PI 8.00 usec  
PLW1 100.87999725 W  
SFO2 400.1316005 MHz  
NUC2 1H  
CPDPRG[2] waltz16  
PCPD2 90.00 usec  
PLW2 22.48500061 W  
PLW12 0.17760000 W  
PLW13 0.08936300 W

F2 - Processing parameters  
SI 32768  
SF 100.6127685 MHz  
WDW EM  
SSB 0  
LB 1.00 Hz  
GB 0  
PC 1.40

# Synthesis of 2-(1-methyl-5-(naphthalen-1-yl)-1H-pyrazol-3-yl)pyridine (5)

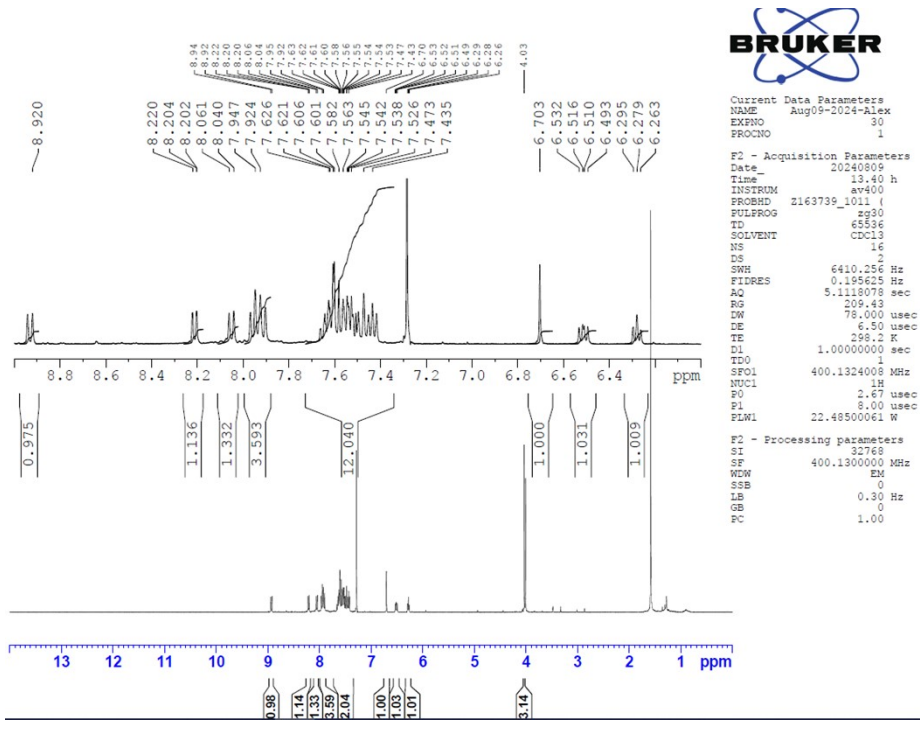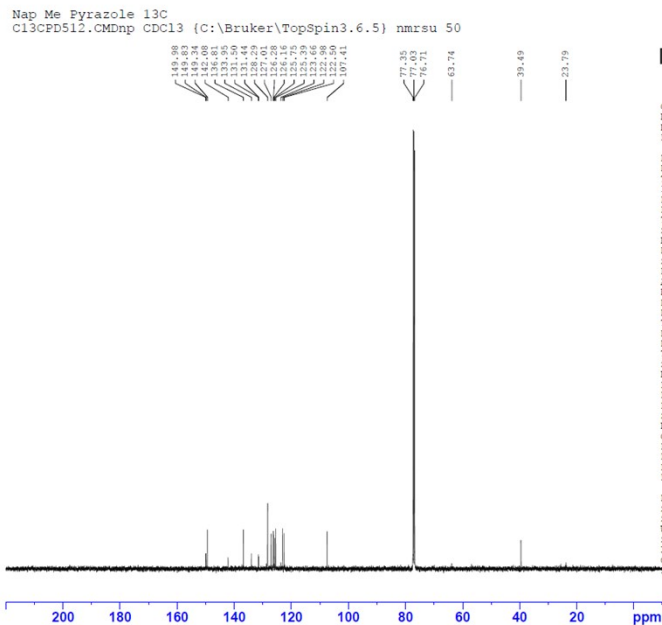

# Synthesis of 2-(5-(anthracen-9-yl)-1-methyl-1H-pyrazol-3-yl)pyridine (6)

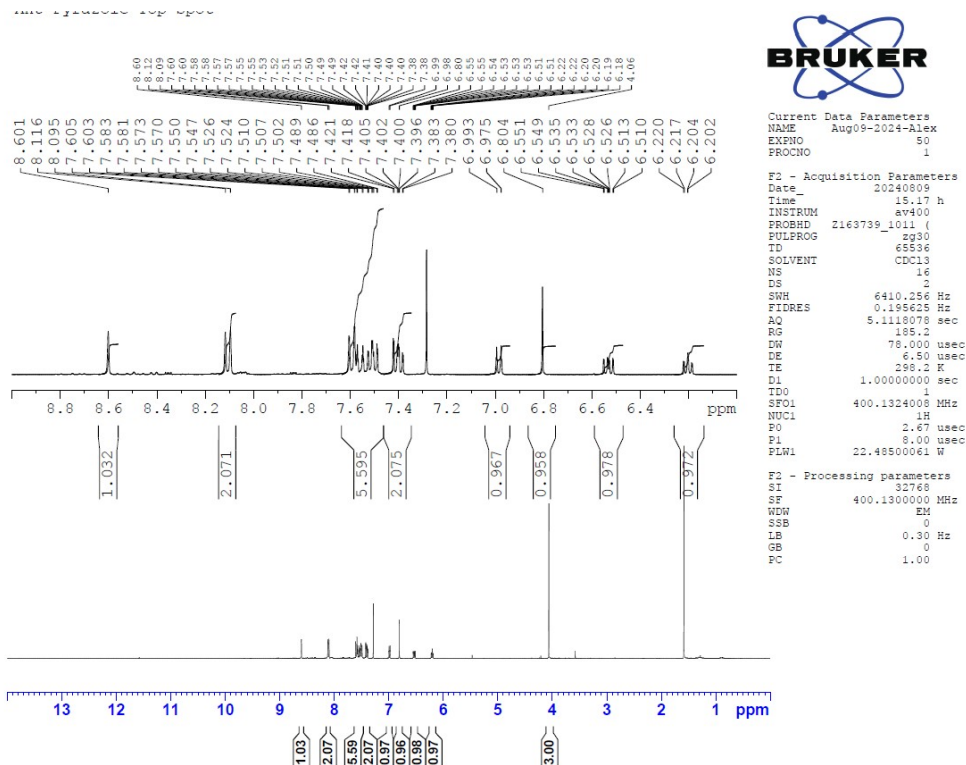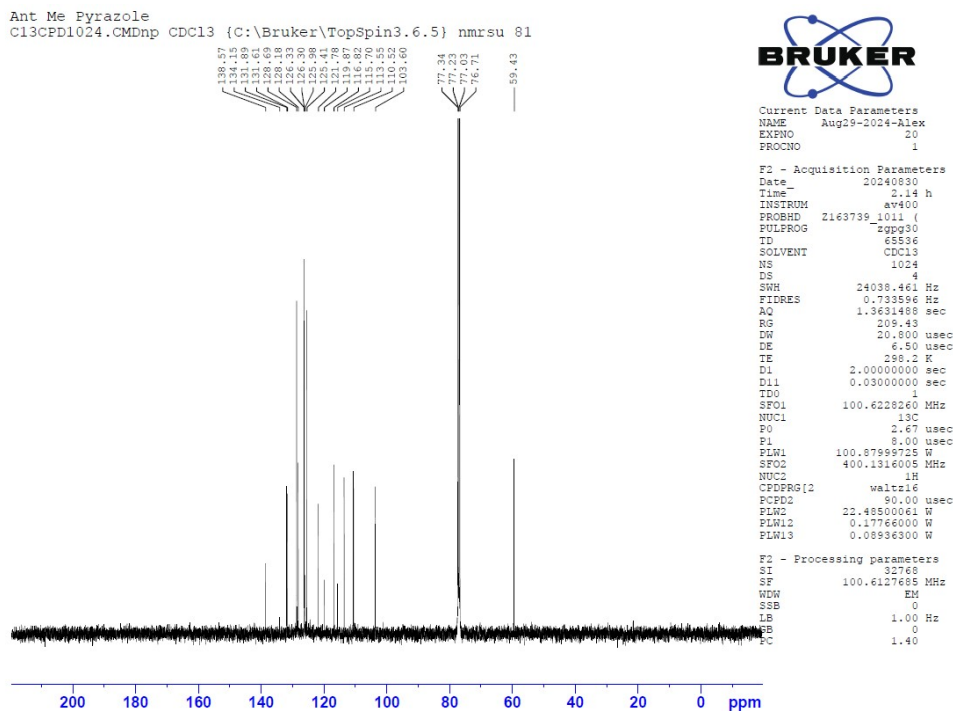

# Synthesis of 2-(5-(anthracen-9-yl)-1-phenyl-1H-pyrazol-3-yl)pyridine (7)

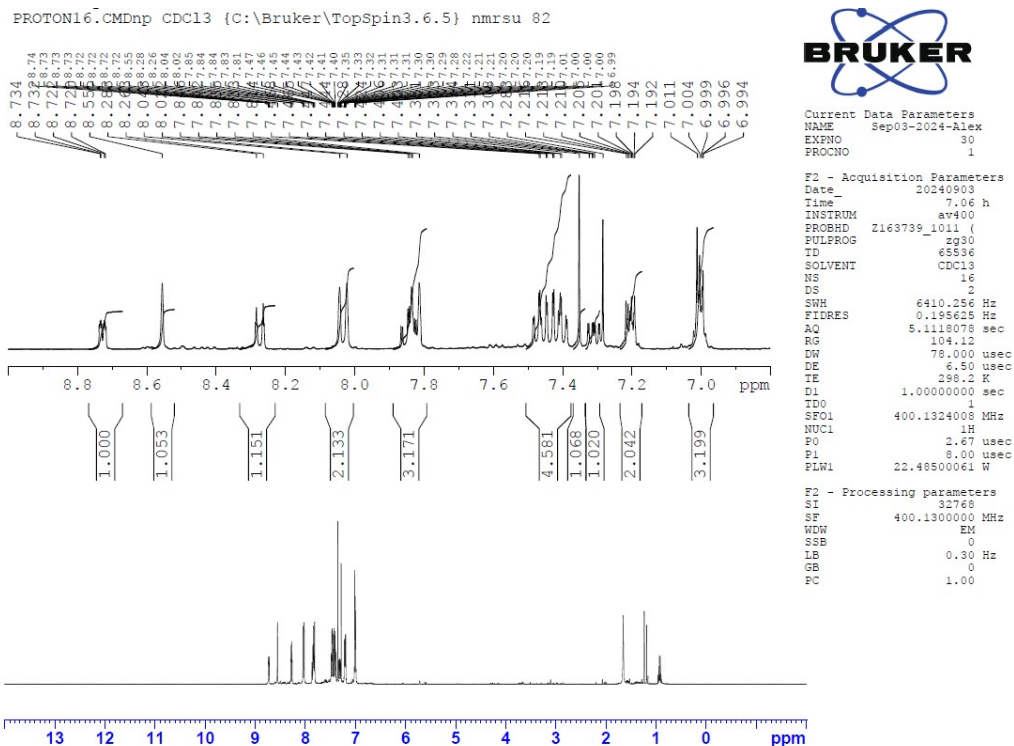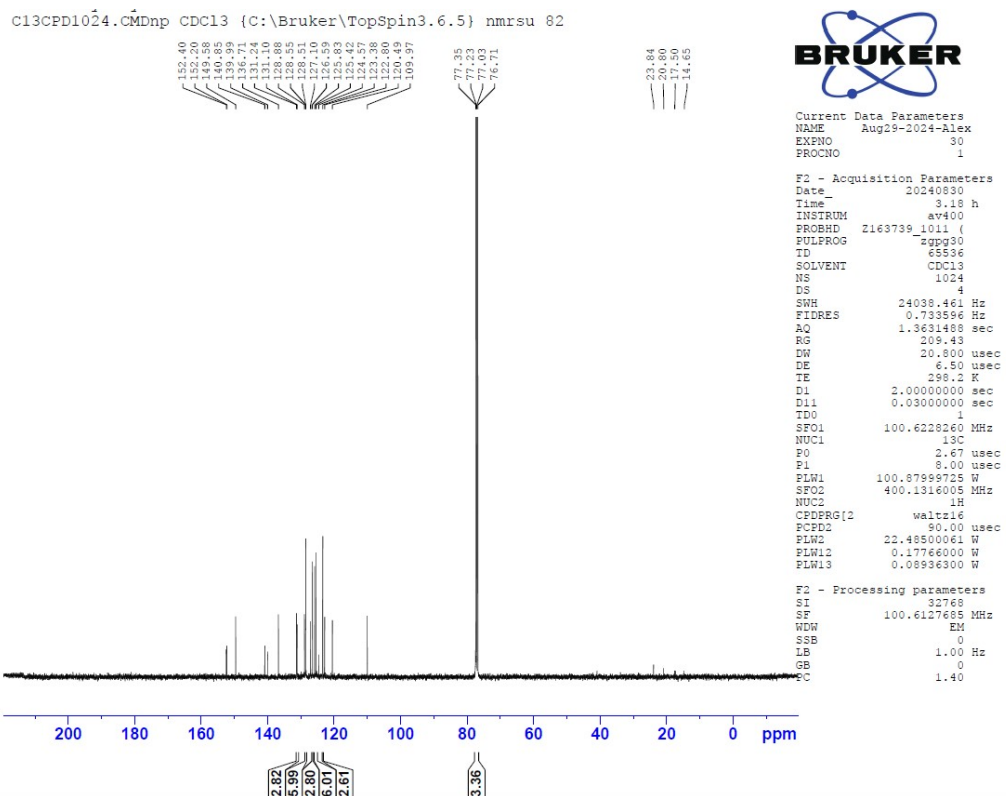



# $^1\text{H}$ NMR Experiments (S3)

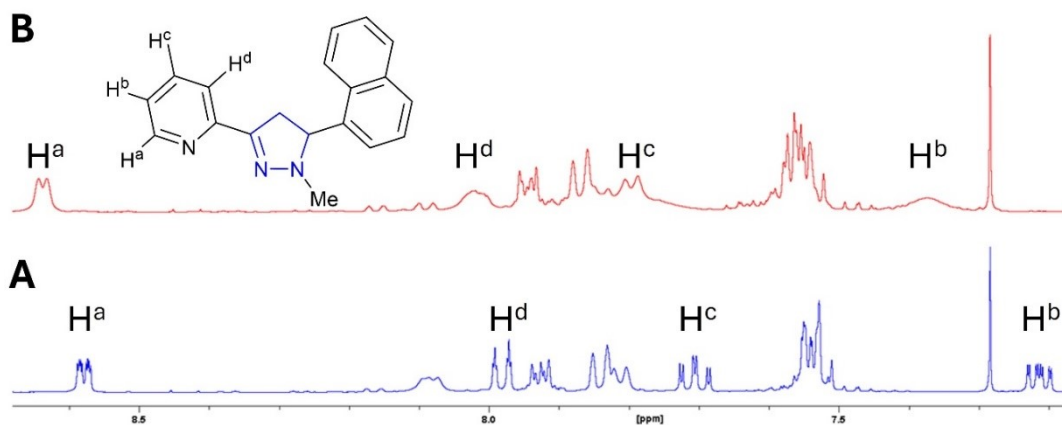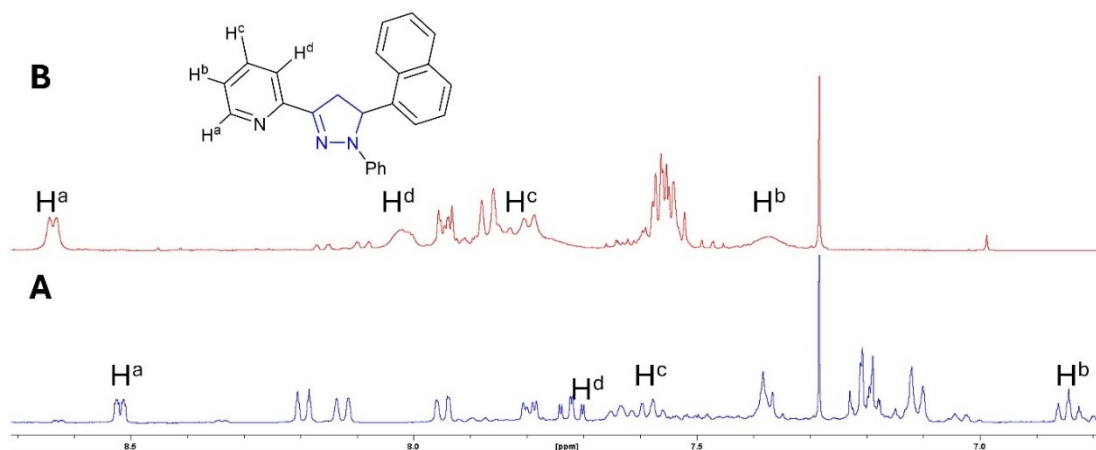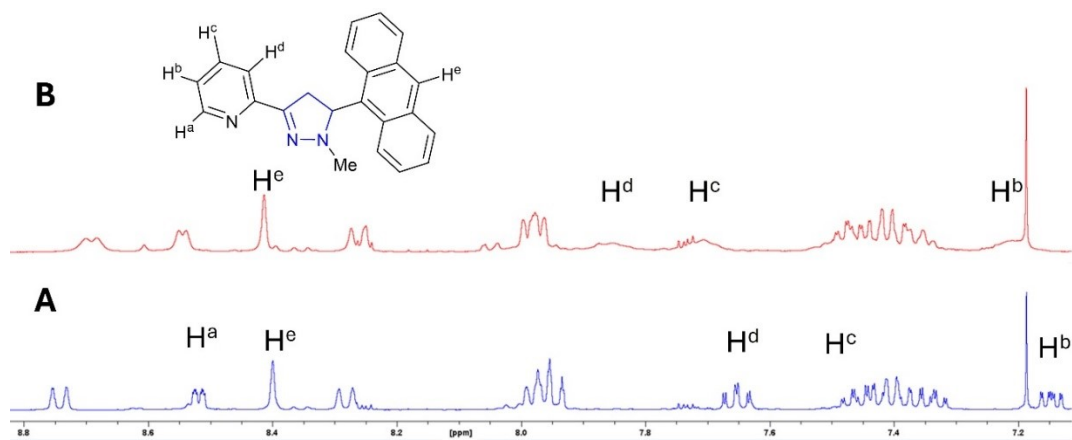

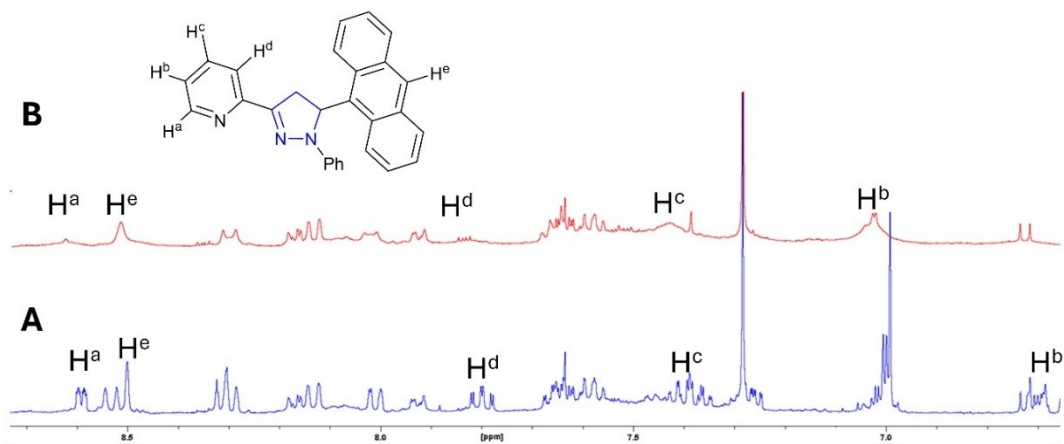

Partial  $^1\text{H}$  NMR spectra for **4** only A (20  $\mu\text{M}$ ,  $\text{CDCl}_3$ ) and B with 2.0 equivalents  $\text{Zn}^{2+}$ .

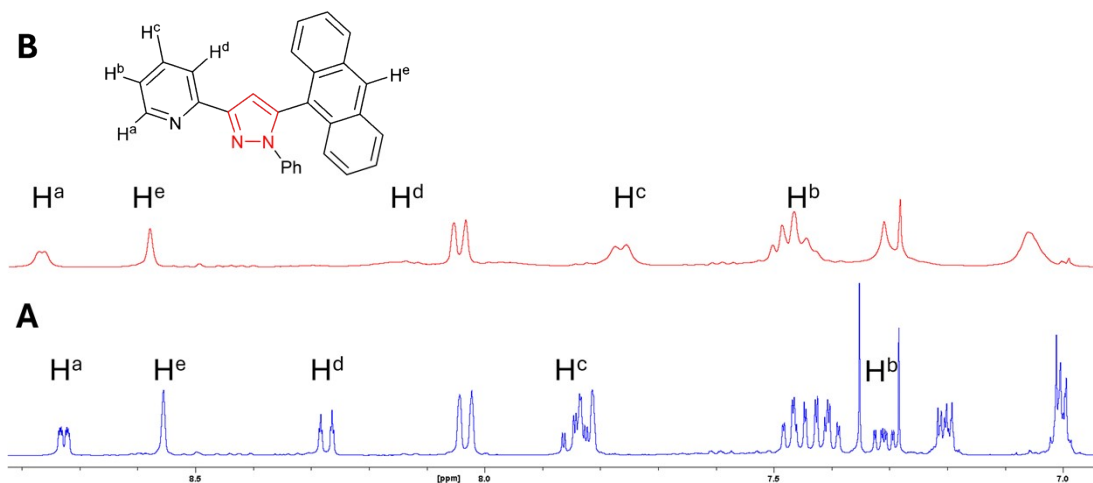

Partial  $^1\text{H}$  NMR spectra for **7** only A (15  $\mu\text{M}$ ,  $\text{CDCl}_3$ ) and B with 2.0 equivalents  $\text{Zn}^{2+}$ .

## UV/Vis Spectroscopy (S4)

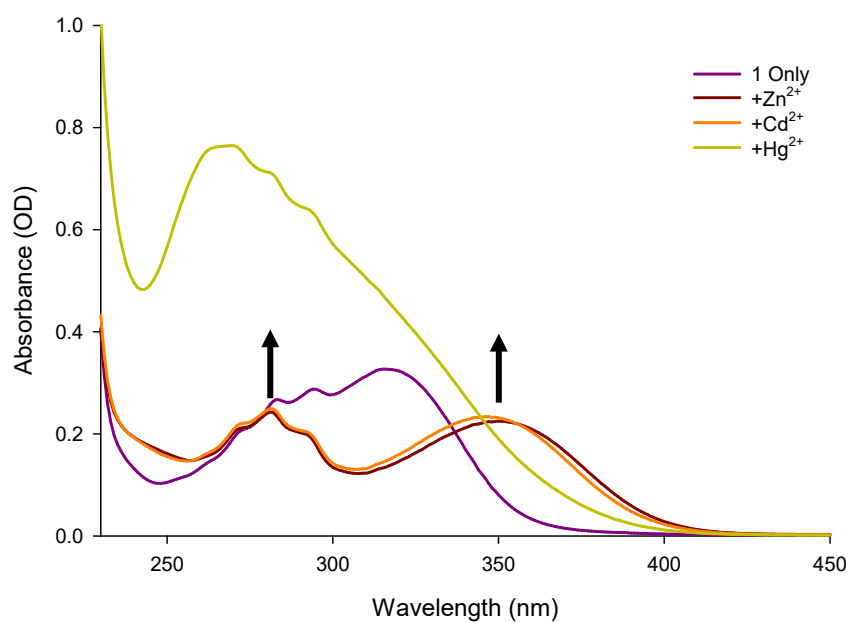

UV/Vis study of **1** only (20  $\mu\text{M}$ , MeCN) and with 5 equivalents  $\text{Zn}^{2+}$ ,  $\text{Cd}^{2+}$  and  $\text{Hg}^{2+}$ . Arrow indicates change in bands.

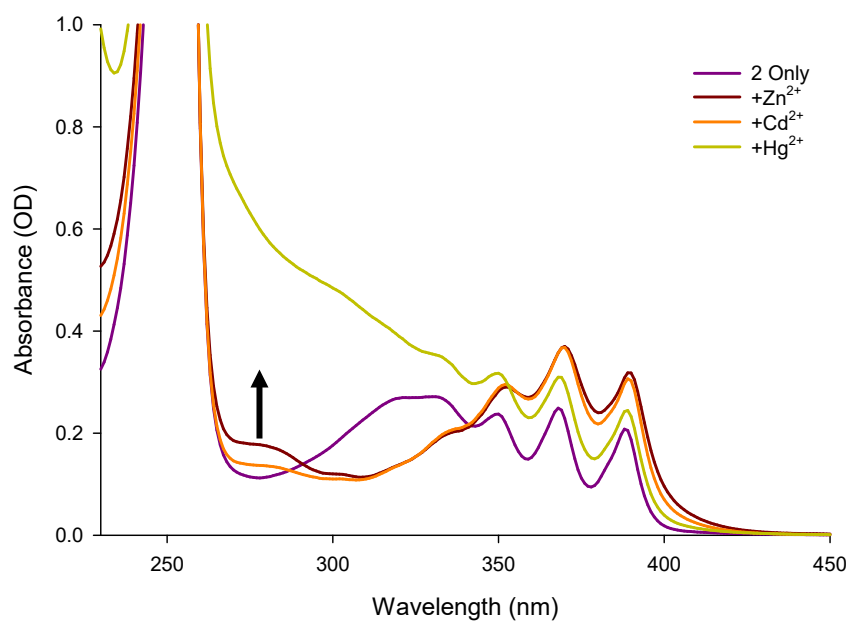

UV/Vis study of **2** only (20  $\mu\text{M}$ , MeCN) and with 5 equivalents  $\text{Zn}^{2+}$ ,  $\text{Cd}^{2+}$  and  $\text{Hg}^{2+}$ . Arrow indicates change in bands.

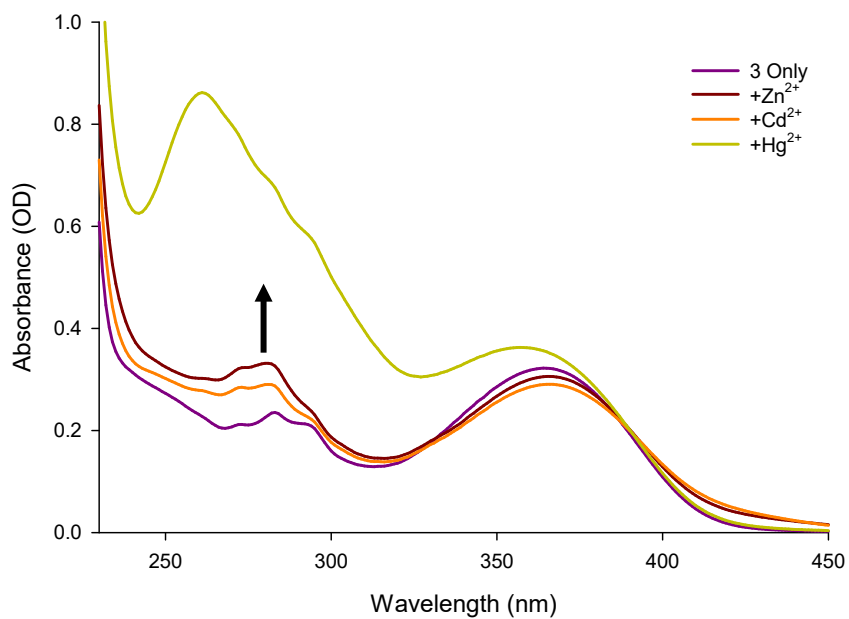

UV/Vis study of **3** only (20  $\mu\text{M}$ , MeCN) and with 5 equivalents  $\text{Zn}^{2+}$ ,  $\text{Cd}^{2+}$  and  $\text{Hg}^{2+}$ . Arrow indicates change in bands.

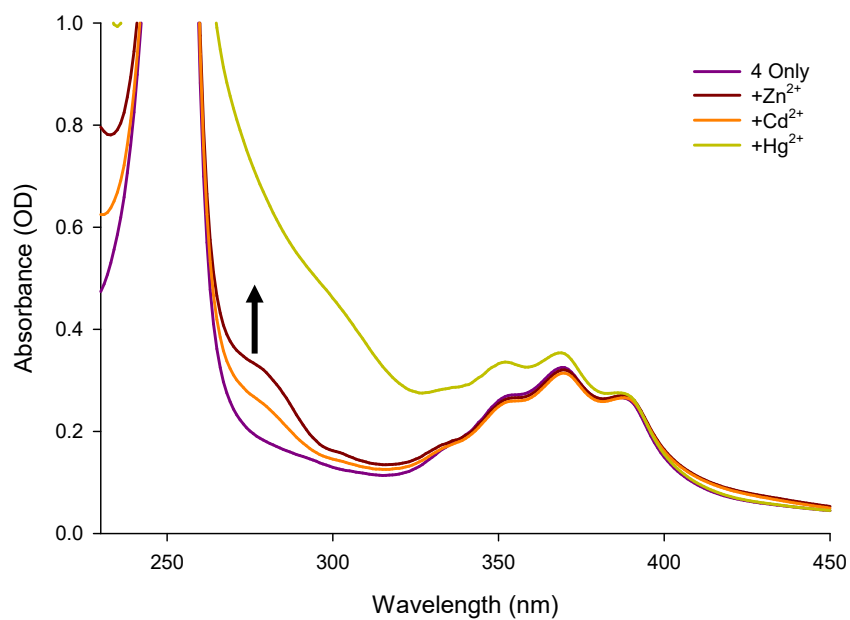

UV/Vis study of **4** only (20  $\mu\text{M}$ , MeCN) and with 5 equivalents  $\text{Zn}^{2+}$ ,  $\text{Cd}^{2+}$  and  $\text{Hg}^{2+}$ . Arrow indicates change in bands.

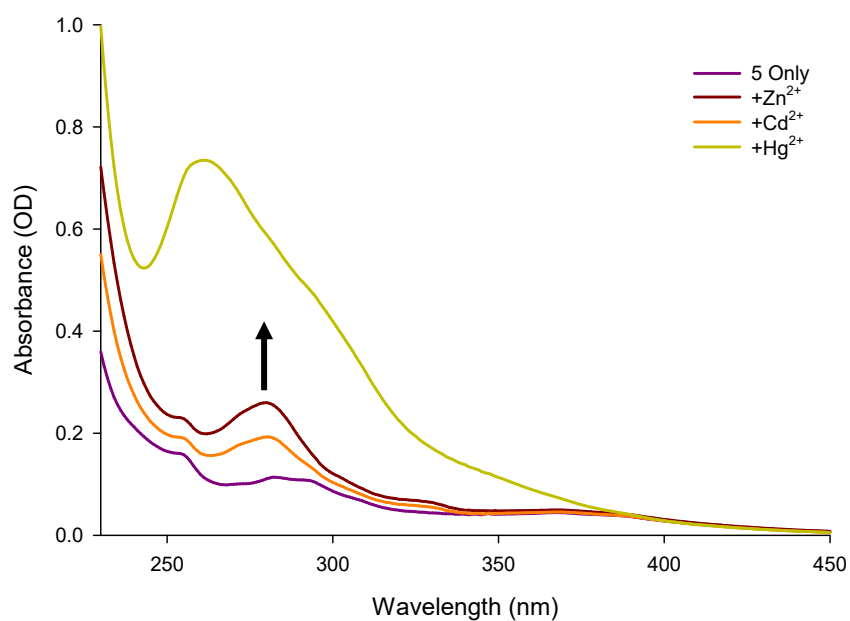

UV/Vis study of **5** only (20  $\mu\text{M}$ , MeCN) and with 5 equivalents  $\text{Zn}^{2+}$ ,  $\text{Cd}^{2+}$  and  $\text{Hg}^{2+}$ . Arrow indicates change in bands.

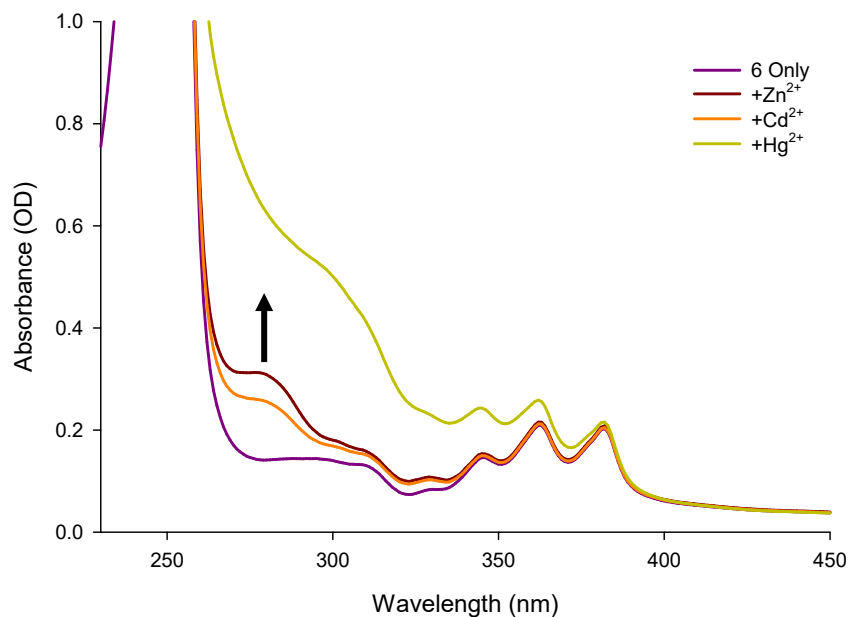

UV/Vis study of **6** only (20  $\mu\text{M}$ , MeCN) and with 5 equivalents  $\text{Zn}^{2+}$ ,  $\text{Cd}^{2+}$  and  $\text{Hg}^{2+}$ . Arrow indicates change in bands.

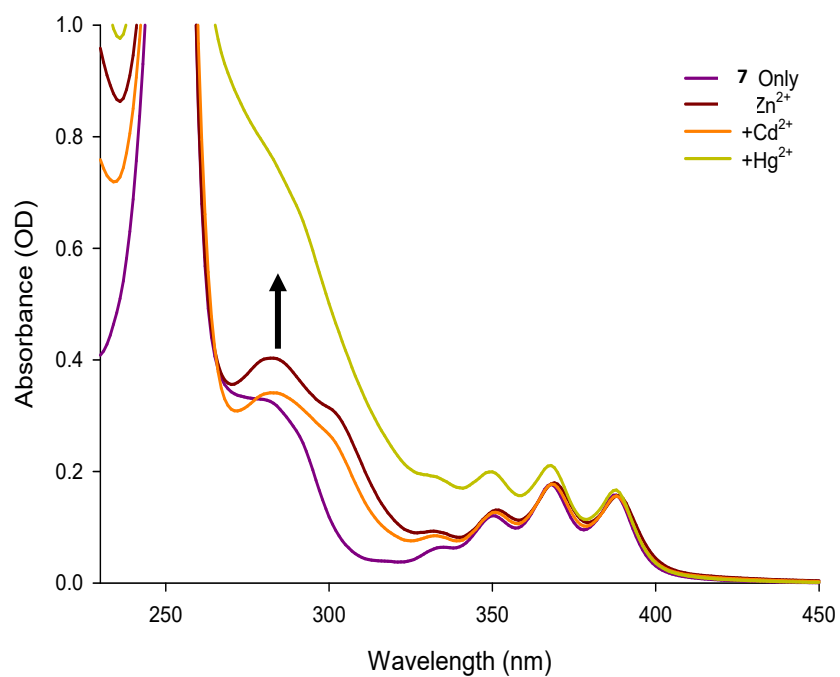

UV/Vis study of **7** only (20  $\mu$ M, MeCN) and with 5 equivalents  $Zn^{2+}$ ,  $Cd^{2+}$  and  $Hg^{2+}$ . Arrow indicates change in bands.

Aqueous study of pyrazoline **1** in 7:3 MeCN:H<sub>2</sub>O solution on addition of Cd<sup>2+</sup> (0-10 equivalents),  $\lambda_{\text{ex}}$  280 nm (S5)

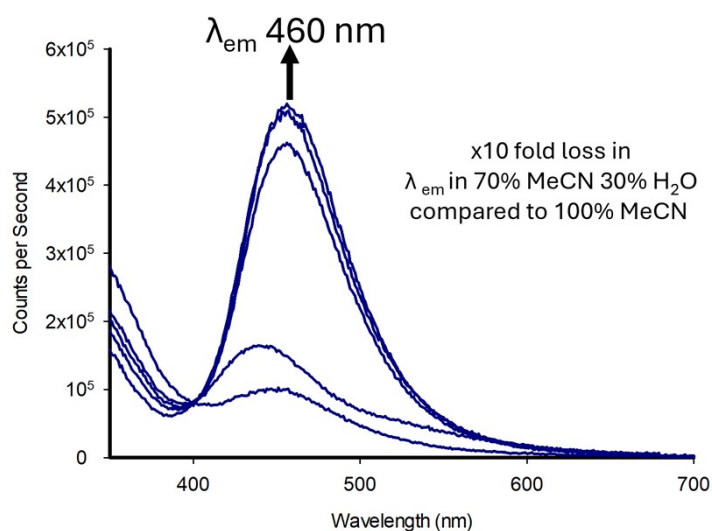

Aqueous study of sensor **2** (20  $\mu$ M, MeCN) with 5.0 equivalents indicated metal in 7:3 MeCN:H<sub>2</sub>O solution at  $\lambda_{\text{ex}}$  280 nm, cps is counts per second

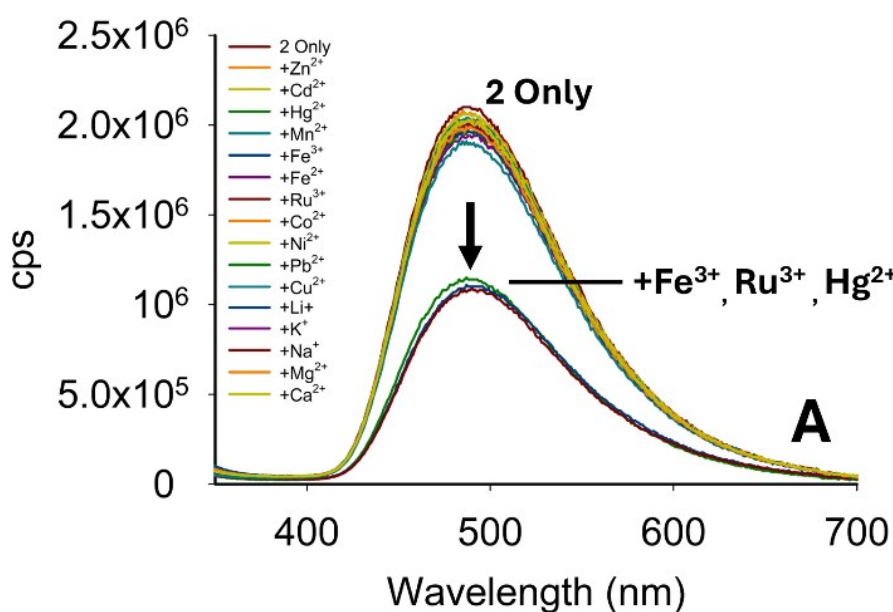

Aqueous study of sensor **7** (20  $\mu\text{M}$ , MeCN) with 5.0 equivalents indicated metal in 7:3 MeCN:H<sub>2</sub>O solution at  $\lambda_{\text{ex}}$  250 nm, cps is counts per second

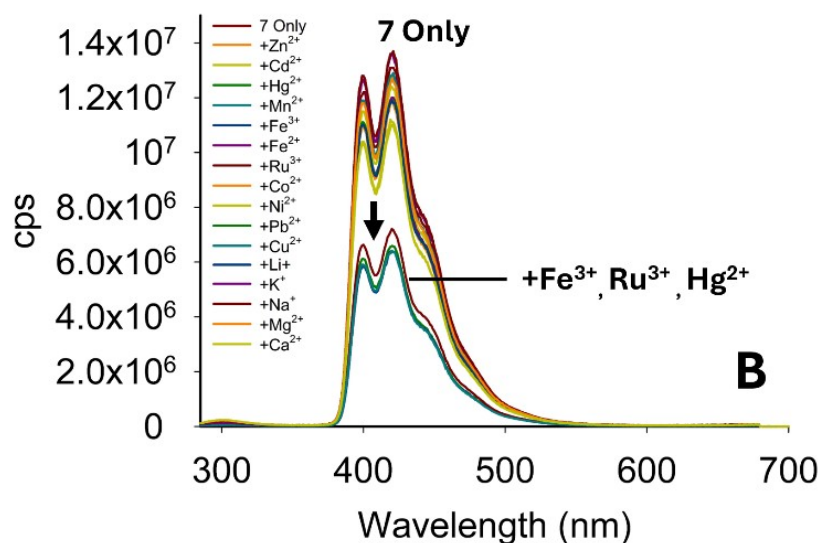

Real-world example of pyrazoline **2** in tap water panel A and mineral water panel B, solution was 7:3 MeCN:H<sub>2</sub>O, **2** concentration 20  $\mu\text{M}$ ,  $\lambda_{\text{ex}}$  280 nm (S6)

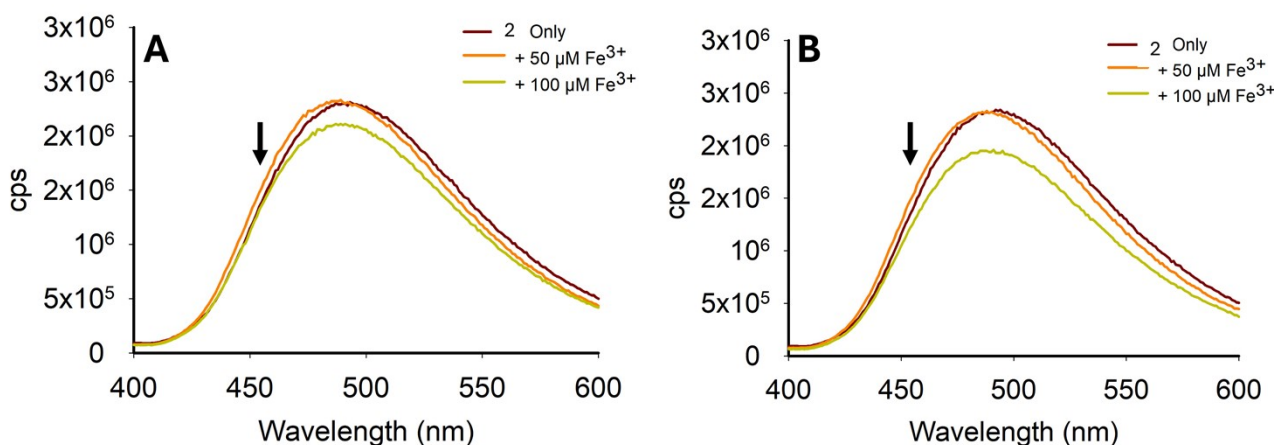



Real-world example of pyrazoline **2** in pond water panel A and river water panel B, solution was 7:3 MeCN:H<sub>2</sub>O, **2** concentration 20 μM, λ<sub>ex</sub> 280 nm  
(S7)

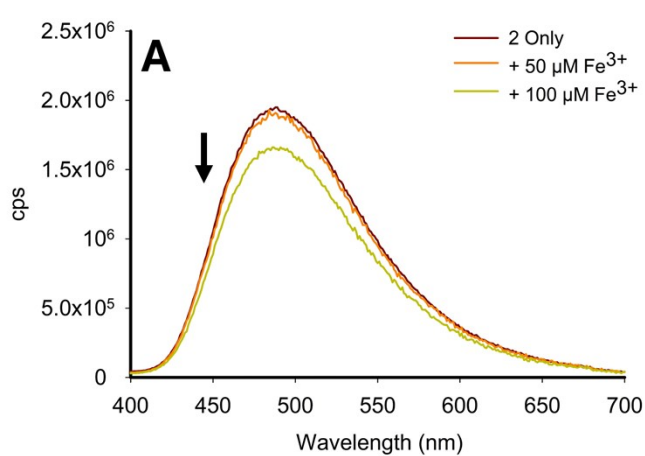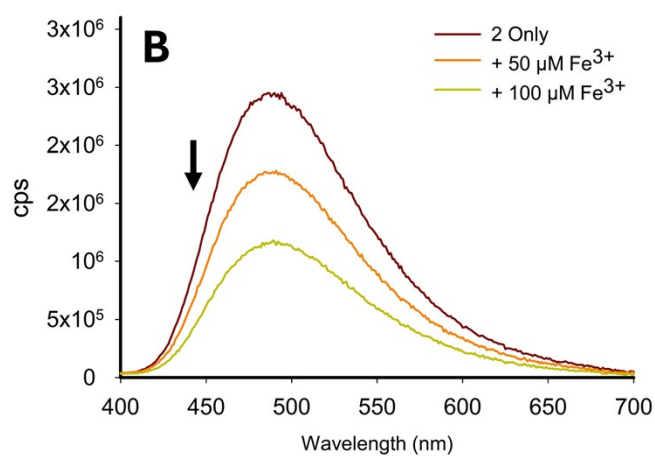

# Limit of Detection (LoD) Studies (S8)

The method reported by Lee *et al* was used to calculate limit of detection (LoD) for **2** ( $\lambda_{ex}$  280 nm) and **7** ( $\lambda_{ex}$  250 nm) in 7:3 MeCN:H<sub>2</sub>O with the average from two replicates used.

$$LoD = 3\sigma_{bi}/m$$

$\sigma_{bi}$  = standard deviation of sensor only (n=10)

m = gradient of the slope, note the inverse sign was used as these are “turn off” sensors not “turn on”

B. P. Joshi, J. Park, W. I. Lee and K.-H. Lee, *Talanta*, 2009, 78, 903.

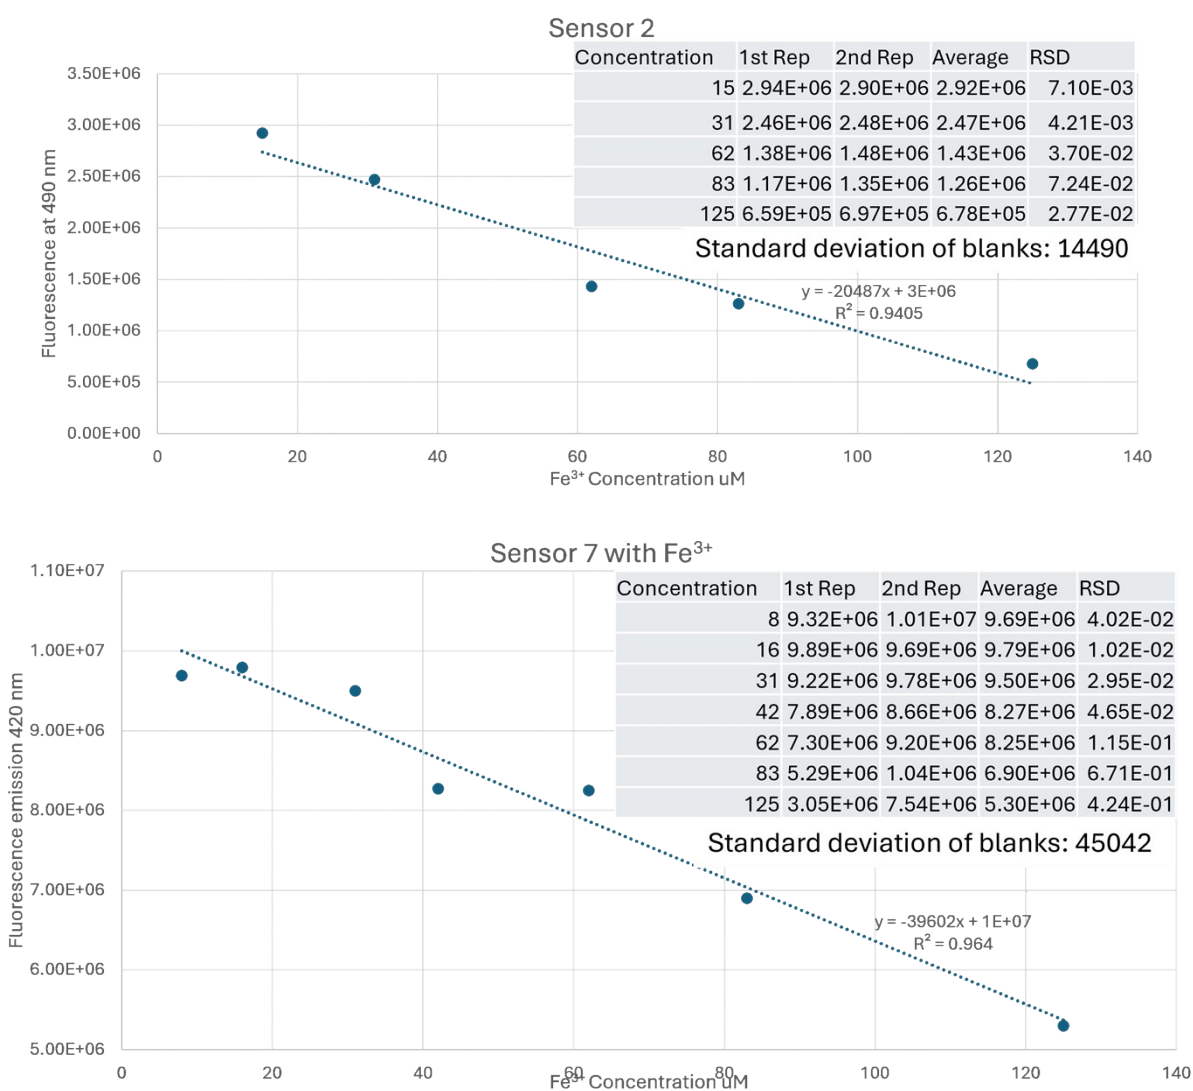

| Analyte          | Structure                      | Detection    | Mode       | LoD      | Solvent                     | Reference                                                      |
|------------------|--------------------------------|--------------|------------|----------|-----------------------------|----------------------------------------------------------------|
| Fe <sup>3+</sup> | Pyrazoline                     | Fluorescence | “Turn off” | 0.401 μM | THF:H <sub>2</sub> O = 9:1  | <i>J. Fluoresc.</i> , 2024, <b>34</b> , 159                    |
| Fe <sup>3+</sup> | Pyrazole                       | Fluorescence | “Turn off” | 1.86 μM  | EtOH:H <sub>2</sub> O = 7:3 | <i>Org. Biomol. Chem.</i> , 2023, <b>21</b> , 4482             |
| Fe <sup>3+</sup> | Pyrazole                       | Fluorescence | “Turn off” | 21 nM    | DMSO:H <sub>2</sub> O = 9:1 | <i>J. Photochem. Photobiol., A</i> , 2023, <b>437</b> , 114470 |
| Fe <sup>3+</sup> | Pyrazole                       | Fluorescence | “Turn off” | 45 nM    | DMSO:H <sub>2</sub> O = 9:1 | <i>New J. Chem.</i> , 2023, <b>47</b> , 751                    |
| Fe <sup>3+</sup> | Pyrazole                       | Fluorescence | “Turn off” | 21 nM    | DMSO:H <sub>2</sub> O = 9:1 | <i>J. Photochem. Photobiol., A</i> , 2023, <b>437</b> , 114470 |
| Fe <sup>3+</sup> | Pyrazoline                     | Fluorescence | “Turn off” | 0.12 μM  | MeOH:H <sub>2</sub> O = 1:9 | <i>J. Fluoresc.</i> , 2022, <b>32</b> , 2319                   |
| Fe <sup>3+</sup> | Pyrazole                       | Fluorescence | “Turn on”  | 1.73 μM  | MeCN:H <sub>2</sub> O = 7:3 | <i>Spectrochim. Acta, Part A</i> , 2020, <b>230</b> , 117993   |
| Fe <sup>3+</sup> | Quinazoline                    | Fluorescence | “Turn on”  | 3.5 μM   | MeCN:H <sub>2</sub> O = 2:8 | <i>Analyst</i> , 2012, <b>137</b> , 3335                       |
| Fe <sup>3+</sup> | Rhodamine–naphthalic anhydride | Fluorescence | “Turn on”  | 2.90 μM  | MeOH:H <sub>2</sub> O = 6:4 | <i>Dalton Trans.</i> , 2015, <b>44</b> , 11805                 |

Selection of recently reported Fe<sup>3+</sup> LoD in a range of solvents

## Quantum Yield calculated using the absolute method and an integrating sphere (S9)

| Sensor    | Solvent                   |                              | Quantum Yield $\phi$ |
|-----------|---------------------------|------------------------------|----------------------|
| <b>S2</b> | MeCN                      | <b>S2</b> only               | 0.74                 |
| <b>S2</b> | MeCN                      | <b>S2</b> + Fe <sup>3+</sup> | <0.01                |
| <b>S2</b> | MeCN:H <sub>2</sub> O 7:3 | <b>S2</b> only               | 0.83                 |
| <b>S2</b> | MeCN:H <sub>2</sub> O 7:3 | <b>S2</b> + Fe <sup>3+</sup> | 0.07                 |
| <b>S7</b> | MeCN                      | <b>S7</b> only               | 0.33                 |
| <b>S7</b> | MeCN                      | <b>S7</b> + Fe <sup>3+</sup> | <0.01                |
| <b>S7</b> | MeCN:H <sub>2</sub> O 7:3 | <b>S7</b> only               | 0.43                 |
| <b>S7</b> | MeCN:H <sub>2</sub> O 7:3 | <b>S7</b> + Fe <sup>3+</sup> | 0.18                 |

## Recovery study for 2 and 7 (S10)

| Sensor                             | Solvent       | cps                     | % Fe <sup>3+</sup> Recovery |
|------------------------------------|---------------|-------------------------|-----------------------------|
| Sensor 2 + 50 μM Fe <sup>3+</sup>  | Mineral Water | 2.309 × 10 <sup>6</sup> | 64%                         |
| Sensor 2 + 100 μM Fe <sup>3+</sup> | Mineral Water | 1.949 × 10 <sup>6</sup> | 40%                         |
| Sensor 2 + 50 μM Fe <sup>3+</sup>  | Tap Water     | 2.314 × 10 <sup>6</sup> | 64%                         |
| Sensor 2 + 100 μM Fe <sup>3+</sup> | Tap Water     | 2.080 × 10 <sup>6</sup> | 38%                         |
| Sensor 2 + 50 μM Fe <sup>3+</sup>  | Pond Water    | 1.870 × 10 <sup>6</sup> | 80%                         |
| Sensor 2 + 100 μM Fe <sup>3+</sup> | Pond Water    | 1.640 × 10 <sup>6</sup> | 48%                         |
| Sensor 2 + 50 μM Fe <sup>3+</sup>  | River Water   | 1.760 × 10 <sup>6</sup> | 68%                         |
| Sensor 2 + 100 μM Fe <sup>3+</sup> | River Water   | 1.170 × 10 <sup>6</sup> | 48%                         |

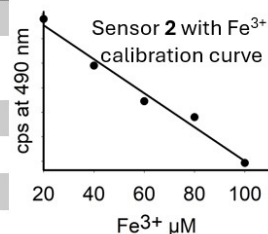

| Sensor                             | Solvent       | cps                     | % Fe <sup>3+</sup> Recovery |
|------------------------------------|---------------|-------------------------|-----------------------------|
| Sensor 7 + 50 μM Fe <sup>3+</sup>  | Mineral Water | 9.435 × 10 <sup>6</sup> | 92%                         |
| Sensor 7 + 100 μM Fe <sup>3+</sup> | Mineral Water | 7.859 × 10 <sup>6</sup> | 66%                         |
| Sensor 7 + 50 μM Fe <sup>3+</sup>  | Tap Water     | 9.561 × 10 <sup>6</sup> | 91%                         |
| Sensor 7 + 100 μM Fe <sup>3+</sup> | Tap Water     | 7.956 × 10 <sup>6</sup> | 65%                         |
| Sensor 7 + 50 μM Fe <sup>3+</sup>  | Pond Water    | 6.920 × 10 <sup>6</sup> | 125%                        |
| Sensor 7 + 100 μM Fe <sup>3+</sup> | Pond Water    | 5.750 × 10 <sup>6</sup> | 90%                         |
| Sensor 7 + 50 μM Fe <sup>3+</sup>  | River Water   | 5.980 × 10 <sup>6</sup> | 145%                        |
| Sensor 2 + 100 μM Fe <sup>3+</sup> | River Water   | 5.360 × 10 <sup>6</sup> | 97%                         |

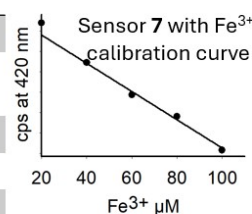

## Job Plot for 7 (S11)

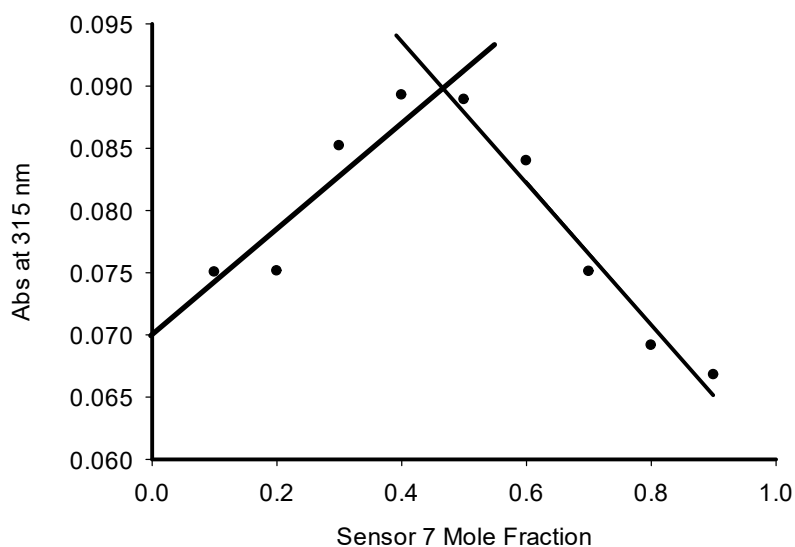

Job plot for 7 with Fe<sup>3+</sup>, [Fe<sup>3+</sup>] + [7] = 100 μM, MeCN
